# Supplementary material for: Phosphide Delivery to a Cyclotrisilene
Source: PubMed Central journal article supplement (PMC4506556; doi:10.1002/anie.201409908), 2014-11-21
Supplement: anie0054-0683-sd1.pdf [file anie0054-0683-sd1.pdf]

Supporting Information

© Wiley-VCH 2014

69451 Weinheim, Germany

**Phosphide Delivery to a Cyclotrisilene\*\***

*Thomas P. Robinson, Michael J. Cowley, David Scheschkewitz,\* and Jose M. Goicoechea\**

anie\_201409908\_sm\_miscellaneous\_information.pdf

## **Supporting Information**

### **Contents**

- 1. Experimental section**
- 2. Single crystal X-ray diffraction data**
- 3. NMR spectra**
- 4. ESI-MS spectra**
- 5. UV-Vis spectra**
- 6. IR spectrum**
- 7. Computation details and MO-plots**
- 8. References**

## 1. Experimental section

General synthetic methods. All reactions and product manipulations were carried out under an inert atmosphere of argon or dinitrogen using standard Schlenk-line or glovebox techniques (MBraun UNIlab glovebox maintained at < 0.1 ppm H<sub>2</sub>O and < 0.1 ppm O<sub>2</sub>). [K(18-crown-6)][PCO] and *c*Si<sub>3</sub>(Tip)<sub>4</sub> were synthesized according to a previously reported synthetic procedure.<sup>[1,2]</sup> 2,2,2-crypt (4,7,13,16,21,24-hexaoxa-1,10-diazabicyclo[8,8,8]-hexacosane; VWR, 99%) was used as received after careful drying under vacuum. Hexane (hex; Sigma Aldrich HPLC grade), pentane (pent; Sigma Aldrich HPLC grade) benzene (Rathburn, HPLC grade), toluene (Sigma Aldrich HPLC grade) were purified using an MBraun SPS-800 solvent system. Tetrahydrofuran (THF; ≥99.9%, Sigma Aldrich) was distilled over a sodium metal/benzophenone mixture. [D<sub>8</sub>]-THF (Euriostop, 99.5%) and [D<sub>8</sub>]-tol (Sigma Aldrich, 99.6%) were dried over CaH<sub>2</sub> and vacuum distilled before use. All dry solvents were stored under argon in gas-tight ampoules. Additionally hexane, pentane, benzene, toluene and THF were stored over activated 3 Å molecular sieves.

Synthesis of [K(2,2,2-crypt)][Si<sub>3</sub>Tip<sub>4</sub>PCO] ([K(2,2,2-crypt)][1]). [K(18-crown-6)][PCO] (150 mg, 0.414 mmol) and 2,2,2-crypt (156 mg, 0.414 mmol) were combined in a Schlenk tube and dissolved in THF (5 mL). A solution of *c*Si<sub>3</sub>(Tip)<sub>4</sub> (372 mg, 0.414 mmol) in THF (10 mL) was subsequently added. The resulting dark orange mixture was stirred for two hours after which all volatiles were removed *in vacuo*. The residue was washed with cold hexanes (3 × 5 mL). The remaining solid was extracted into toluene and filtered *via* cannula. The toluene was removed *in vacuo* and the oily residue extracted into hot hexane and filtered immediately. Upon standing at room temperature an orange precipitate of [K(2,2,2-crypt)][1] formed, which was isolated by decanting the supernatant solution. The product was purified by crystallisation from hot benzene. Yield: 208 mg (37%). Calculated for C<sub>79</sub>H<sub>128</sub>KN<sub>2</sub>O<sub>7</sub>PSi<sub>3</sub>: C 69.17, H 9.40, N 2.04. Observed: C 66.99, H 9.02, N 2.08. Samples were found to be

recurrently and reproducibly deficient in carbon.  $^{31}\text{P}\{^1\text{H}\}$  (202.38 MHz,  $[\text{D}_8]$ -THF, 298 K):  $\delta$  (ppm)  $-323.0$  ( $^1J_{\text{P-Si}}$  satellites = 97.9 Hz).  $^{29}\text{Si}\{^1\text{H}\}$  (99.3 MHz,  $[\text{D}_8]$ -THF, 298 K):  $\delta$  (ppm)  $-1.8$  (d,  $^2J_{\text{Si-P}} = 19.6$  Hz),  $-10.9$  (d,  $^1J_{\text{Si-P}} = 97.9$  Hz),  $-16.1$  (d,  $^1J_{\text{Si-P}} = 94.9$  Hz).  $^1\text{H}$  NMR (500 MHz,  $[\text{D}_8]$ THF, 298 K):  $\delta$  (ppm) 7.05 (d,  $^4J_{\text{H-H}} = 1.73$  Hz, 1H; Ar-CH), 6.90 (br s, 2H; Ar-CH), 6.84 (v br s, 2H; Ar-CH), 6.71 (d,  $^4J_{\text{H-H}} = 1.46$  Hz, 1H; Ar-CH), 6.63 (d,  $^4J_{\text{H-H}} = 1.73$  Hz, 1H; Ar-CH), 6.57 (d,  $^4J_{\text{H-H}} = 1.63$  Hz, 1H; Ar-CH), 4.99 (v br s, 1H; *i*Pr-CH), 4.63 (sept,  $^3J_{\text{H-H}} = 6.4$  Hz, 1H; *i*Pr-CH), 4.49 (sept,  $^3J_{\text{H-H}} = 6.4$  Hz, 1H; *i*Pr-CH), 4.05 (sept,  $^3J_{\text{H-H}} = 6.4$  Hz, 1H; *i*Pr-CH), 3.56 (sept,  $^3J_{\text{H-H}} = 6.7$  Hz, 1H; *i*Pr-CH), 3.45 (s, 12H; 2,2,2-crypt), 3.42–3.40 (m, 12H; 2,2,2-crypt), 3.31 (sept,  $^3J_{\text{H-H}} = 6.7$  Hz, 1H; *i*Pr-CH), 3.12 (sept,  $^3J_{\text{H-H}} = 6.7$  Hz, 1H; *i*Pr-CH), 2.80–2.63 (m, 4H;  $5 \times$  *i*Pr-CH), 2.43–2.41 (m, 12H; 2,2,2-crypt), 1.75 (d,  $^3J_{\text{H-H}} = 6.7$  Hz, 3H; *i*Pr-CH<sub>3</sub>), 1.54 (d,  $^3J_{\text{H-H}} = 6.4$  Hz, 3H; *i*Pr-CH<sub>3</sub>), 1.51 (d,  $^3J_{\text{H-H}} = 6.7$  Hz, 3H; *i*Pr-CH<sub>3</sub>), 1.31 (v br s, 6H;  $2 \times$  *i*Pr-CH<sub>3</sub>), 1.28 (d,  $^3J_{\text{H-H}} = 6.7$  Hz, 3H; *i*Pr-CH<sub>3</sub>), 1.25 (d,  $^3J_{\text{H-H}} = 6.4$  Hz, 3H; *i*Pr-CH<sub>3</sub>), 1.18–1.10 (m, 30H;  $10 \times$  *i*Pr-CH<sub>3</sub>), 1.04 (d,  $^3J_{\text{H-H}} = 6.4$  Hz, 3H; *i*Pr-CH<sub>3</sub>), 0.56 (d,  $^3J_{\text{H-H}} = 6.7$  Hz, 3H; *i*Pr-CH<sub>3</sub>), 0.47 (d,  $^3J_{\text{H-H}} = 6.4$  Hz, 3H; *i*Pr-CH<sub>3</sub>), 0.34 (d,  $^3J_{\text{H-H}} = 6.4$  Hz, 3H; *i*Pr-CH<sub>3</sub>), 0.23 (v br s, 3H; *i*Pr-CH<sub>3</sub>), 0.09 (d,  $^3J_{\text{H-H}} = 6.4$  Hz, 3H; *i*Pr-CH<sub>3</sub>),  $-0.01$  (d,  $^3J_{\text{H-H}} = 6.4$  Hz, 3H; *i*Pr-CH<sub>3</sub>).  $^1\text{H}$  NMR (499.9 MHz,  $[\text{D}_8]$ -THF, 253 K):  $\delta$  (ppm) 7.04 (s, 1H; Ar-CH), 6.92 (s, 1H; Ar-CH), 6.90 (s, 2H; Ar-CH), 6.74 (s, 1H; Ar-CH), 6.71 (s, 1H; Ar-CH), 6.64 (s, 1H; Ar-CH), 6.57 (s, 1H; Ar-CH), 4.98 (br sept,  $^3J_{\text{H-H}} = 6.4$  Hz, 1H; *i*Pr-CH), 4.60 (sept,  $^3J_{\text{H-H}} = 6.4$  Hz, 1H; *i*Pr-CH), 4.48 (sept,  $^3J_{\text{H-H}} = 6.7$  Hz; 1H, *i*Pr-CH), 4.01 (sept,  $^3J_{\text{H-H}} = 6.4$  Hz, 1H; *i*Pr-CH), 3.50 (sept,  $^3J_{\text{H-H}} = 6.4$  Hz, 1H; *i*Pr-CH), 3.44 (s, 12H; 2,2,2-crypt), 3.40–3.39 (m, 12H; 2,2,2-crypt), 3.29 (sept,  $^3J_{\text{H-H}} = 6.7$  Hz, 1H; *i*Pr-CH), 3.09 (sept,  $^3J_{\text{H-H}} = 6.4$  Hz, 1H; *i*Pr-CH), 2.78–2.62 (m, 4H;  $5 \times$  *i*Pr-CH), 2.40 (br s, 12H; 2,2,2-crypt), 1.74 (d, 3H; *i*Pr-CH<sub>3</sub>, obscured by solvent), 1.55 (d,  $^3J_{\text{H-H}} = 6.4$  Hz, 3H; *i*Pr-CH<sub>3</sub>), 1.49 (d,  $^3J_{\text{H-H}} = 6.4$  Hz, 3H; *i*Pr-CH<sub>3</sub>), 1.41 (d,  $^3J_{\text{H-H}} = 6.1$  Hz, 3H; *i*Pr-CH<sub>3</sub>), 1.33 (d,  $^3J_{\text{H-H}} = 6.1$  Hz, 3H; *i*Pr-CH<sub>3</sub>), 1.26 (d,  $^3J_{\text{H-H}} = 6.7$  Hz, 3H; *i*Pr-CH<sub>3</sub>), 1.24–1.20 (m,

6H; 2 × *i*Pr-CH<sub>3</sub>), 1.20–1.08 (m, 27H; 10 × *i*Pr-CH<sub>3</sub>), 1.02 (d, <sup>3</sup>*J*<sub>H-H</sub> = 6.4 Hz, 3H; *i*Pr-CH<sub>3</sub>), 0.54 (d, <sup>3</sup>*J*<sub>H-H</sub> = 6.7 Hz, 3H; *i*Pr-CH<sub>3</sub>), 0.45 (d, <sup>3</sup>*J*<sub>H-H</sub> = 6.7 Hz, 3H; *i*Pr-CH<sub>3</sub>), 0.32 (d, <sup>3</sup>*J*<sub>H-H</sub> = 6.7 Hz, 3H; *i*Pr-CH<sub>3</sub>), 0.20 (d, <sup>3</sup>*J*<sub>H-H</sub> = 6.4 Hz, 3H; *i*Pr-CH<sub>3</sub>), 0.05 (d, <sup>3</sup>*J*<sub>H-H</sub> = 6.7 Hz, 3H; *i*Pr-CH<sub>3</sub>), -0.06 (d, <sup>3</sup>*J*<sub>H-H</sub> = 6.4 Hz, 3H; *i*Pr-CH<sub>3</sub>). <sup>13</sup>C{<sup>1</sup>H} (125.8 MHz, [D<sub>8</sub>]-THF, 298 K): δ (ppm) 222.7 (d, <sup>2</sup>*J*<sub>C-P</sub> = 15.7 Hz; C=O), 156.7 (br; Tip-C), 156.3 (Tip-C), 156.2 (Tip-C), 155.7 (Tip-C), 154.7 (Tip-C), 153.2 (Tip-C), 152.3 (Tip-C), 148.1 (Tip-C), 147.6 (Tip-C), 147.4 (Tip-C), 146.7 (Tip-C), 142.2 (Tip-C), 138.5 (Tip-C), 137.6 (d, <sup>15</sup>*J*<sub>C-P</sub> = 6.5 Hz; Tip-C), 135.8 (Tip-C), 122.0 (Tip-CH), 121.9 (Tip-CH), 121.5 (Tip-CH), 120.4 (Tip-CH), 120.2 (Tip-CH), 118.9 (Tip-CH), 71.0 (2,2,2-crypt), 68.2 (2,2,2-crypt), 54.5 (2,2,2-crypt), 39.3 (*i*Pr-CH), 36.3 (*i*Pr-CH), 35.9 (br, *i*Pr-CH), 35.8 (*i*Pr-CH), 35.2 (*i*Pr-CH), 35.1 (*i*Pr-CH), 35.1 (*i*Pr-CH), 35.0 (*i*Pr-CH), 35.0 (*i*Pr-CH), 34.2 (*i*Pr-CH), 30.8 (d, <sup>15</sup>*J*<sub>C-P</sub> = 11.4 Hz; *i*Pr-CH<sub>3</sub>), 29.6 (*i*Pr-CH<sub>3</sub>), 29.4 (d, <sup>15</sup>*J*<sub>C-P</sub> = 11.4 Hz; *i*Pr-CH<sub>3</sub>), 28.8 (v br; *i*Pr-CH<sub>3</sub>), 27.7 (*i*Pr-CH<sub>3</sub>), 25.4\* (*i*Pr-CH<sub>3</sub>), 24.7 (*i*Pr-CH<sub>3</sub>), 24.5 (*i*Pr-CH<sub>3</sub>), 24.4 (*i*Pr-CH<sub>3</sub>), 24.3 (*i*Pr-CH<sub>3</sub>), 24.2 (*i*Pr-CH<sub>3</sub>), 24.1 (*i*Pr-CH<sub>3</sub>), 23.4 (*i*Pr-CH<sub>3</sub>), 21.3 (*i*Pr-CH<sub>3</sub>). (\* Obscured by solvent). IR (Nujol): ν(CO) = 1584 cm<sup>-1</sup>. UV-Vis (THF): λ<sub>max</sub>(ε) = 490 nm (1462), 348 nm (10147), 282 nm (32930). ESI-MS (THF, negative mode): *m/z* 927.75 [Si<sub>3</sub>Tip<sub>4</sub>P]<sup>-</sup> (18%), 955.80 [Si<sub>3</sub>Tip<sub>4</sub>PCO]<sup>-</sup> (100%\*). No mass envelopes observed in the positive mode.

Note: The <sup>1</sup>H NMR spectrum reveals a dynamic process for the two Tip groups of the Si(Tip)<sub>2</sub> centre, not unlike the one previously reported for *c*Si<sub>3</sub>(Tip)<sub>4</sub>. This fluxional behaviour was resolved at 253 K (however extensive overlap of resonances in the VT <sup>1</sup>H NMR spectra precludes the calculation of activation parameters).

Synthesis of [K(18-crown-6)][Si<sub>3</sub>Tip<sub>4</sub>P] ([K(18-crown-6)][2]). [K(18-crown-6)][PCO] (75 mg, 0.207 mmol) and *c*Si<sub>3</sub>(Tip)<sub>4</sub> (185 mg, 0.207 mmol) were combined in an air-tight ampoule and toluene (15 mL) was added at -30 °C. The solution was maintained at -30 °C

for 2 hours after which it was slowly warmed to room temperature and stirred for a further 12 hours. The resulting blue/green solution contains a mixture of compounds **1** and **2** in a ratio of *ca.* 1:4. To completely drive the reaction towards the formation of **2**, the solution was irradiated using a 600 W broadband UV lamp for *ca.* 6 hours with progress monitored by  $^{31}\text{P}$  NMR spectroscopy. When conversion was complete the solution was filtered *via* cannula and all volatiles were removed *in vacuo* affording a green/blue oil. The oil was dissolved in pentane (10 mL) with minimal stirring and left to stand at room temperature for 12 hours yielding dark blue crystals of  $[\text{K}(18\text{-crown-6})][\text{Si}_3\text{Tip}_4\text{P}]$ , which were isolated by decanting the supernatant solution. Yield = 115 mg (45%). Diffraction quality single-crystals were grown from toluene at  $-35\text{ }^\circ\text{C}$ . Calculated for  $\text{C}_{72}\text{H}_{116}\text{KO}_6\text{PSi}_3$ : C 70.19, H 9.49, N 0.00. Observed: C 70.06, H 9.35, N 0.00.  $^{31}\text{P}\{^1\text{H}\}$  (202.4 Hz,  $[\text{D}_8]$ -THF, 298 K):  $\delta$  (ppm)  $-56.6$  ( $^1J_{\text{P-Si}}$  satellites = 138.2 Hz,  $^1J_{\text{P-Si}}$  satellites = 72.5 Hz).  $^{29}\text{Si}\{^1\text{H}\}$  (99.3 MHz,  $[\text{D}_8]$ -THF, 298 K):  $\delta$  193.1 (d,  $^1J_{\text{Si-P}} = 138.2$  Hz),  $-14.9$  (d,  $^1J_{\text{Si-P}} = 72.5$  Hz),  $-39.9$  (d,  $^2J_{\text{Si-P}} = 35.4$  Hz).  $^{31}\text{P}\{^1\text{H}\}$  (202.4 Hz,  $[\text{D}_8]$ -Tol, 298 K):  $\delta$  (ppm)  $-93.9$  ( $^1J_{\text{P-Si}} = 129.2$  Hz,  $^1J_{\text{P-Si}} = 65.6$  Hz).  $^{29}\text{Si}\{^1\text{H}\}$  (99.3 MHz,  $[\text{D}_8]$ -Tol, 298 K):  $\delta$  (ppm) 187.7 (d,  $^1J_{\text{Si-P}} = 128.8$  Hz),  $-13.9$  (d,  $^1J_{\text{Si-P}} = 65.1$  Hz),  $-22.6$  (d,  $^2J_{\text{Si-P}} = 38.2$  Hz).  $^1\text{H}$  NMR (499.9 MHz,  $[\text{D}_8]$ -THF, 298 K):  $\delta$  (ppm) 7.00 (br, 1H; Ar-CH), 6.90 (br, 1H; Ar-CH), 6.83 (s, 2H; Ar-CH), 6.65 (br s, 4H; Ar-CH), 6.48 (br, 1H; Ar-CH), 5.91 (br, 1H; *i*Pr-CH), 4.79 (v br, 2H; *i*Pr-CH), 4.71 (sept,  $^3J_{\text{H-H}} = 6.7$  Hz, 2H; *i*Pr-CH), 4.18 (br, 1H; *i*Pr-CH), 3.53 (v br, 2H; *i*Pr-CH), 3.51 (s, 24H; 18-crown-6), 2.74 (sept,  $^3J_{\text{H-H}} = 6.9$  Hz, 1H; *i*Pr-CH), 2.67 (br sept, 2H; *i*Pr-CH), 2.62 (sept,  $^3J_{\text{H-H}} = 6.9$  Hz, 1H; *i*Pr-CH), 1.50–1.21 (br, 3H; *i*Pr-CH<sub>3</sub>), 1.43 (br, 6H; *i*Pr-CH<sub>3</sub>), 1.36 (br, 6H; *i*Pr-CH<sub>3</sub>), 1.28 (br, 12H; *i*Pr-CH<sub>3</sub>), 1.21–0.99 (br, 9H; *i*Pr-CH<sub>3</sub>), 1.18 (d,  $^3J_{\text{H-H}} = 6.9$  Hz, 6H; *i*Pr-CH<sub>3</sub>), 1.14 (br, d, 12H; *i*Pr-CH<sub>3</sub>), 1.08 (d,  $^3J_{\text{H-H}} = 6.9$  Hz, 6H; *i*Pr-CH<sub>3</sub>), 0.76 (v br, 3H; *i*Pr-CH<sub>3</sub>), 0.30 (br, 3H; *i*Pr-CH<sub>3</sub>), 0.20 (br, 3H; *i*Pr-CH<sub>3</sub>), 0.03 (br, 3H; *i*Pr-CH<sub>3</sub>).  $^1\text{H}$  NMR (499.9 MHz,  $[\text{D}_8]$ -THF, 233 K):  $\delta$  (ppm) 7.00 (s, 1H; Tip-CH), 6.89 (s, 1H; Tip-CH), 6.83 (s, 2H; Tip-

CH), 6.74 (broad s, 1H; Tip-CH), 6.63 (s, 2H; Tip-CH), 6.54 (broad s, 1H; Tip-CH), 6.46 (s, 1H; Tip-CH), 5.88 (sept,  $^3J_{\text{H-H}} = 6.5$  Hz, 1H; *i*Pr-CH), 5.46 (broad s, 1H; *i*Pr-CH), 4.69 (broad m, 2H; *i*Pr-CH), 4.17 (sept,  $^3J_{\text{H-H}} = 6.5$  Hz, 1H; *i*Pr-CH), 4.08 (broad s, 1H; *i*Pr-CH), 3.56–3.43 (m, 2H, *i*Pr-CH), 3.51 (s, 24H, 18-crown-6), 2.74 (sept,  $^3J_{\text{H-H}} = 6.9$  Hz, 1H; *i*Pr-CH), 2.71–2.62 (m, 2H; *i*Pr-CH), 2.62 (sept,  $^3J_{\text{H-H}} = 6.9$  Hz, 1H; *i*Pr-CH), 1.42 (d,  $^3J_{\text{H-H}} = 6.5$  Hz, 6H; *i*Pr-CH<sub>3</sub>), 1.36–1.33 (m, 6H; *i*Pr-CH<sub>3</sub>), 1.31 (d,  $^3J_{\text{H-H}} = 6.5$  Hz, 6H; *i*Pr-CH<sub>3</sub>), 1.26 (d,  $^3J_{\text{H-H}} = 6.9$  Hz, 6H; *i*Pr-CH<sub>3</sub>), 1.17 (d,  $^3J_{\text{H-H}} = 6.9$  Hz, 6H; *i*Pr-CH<sub>3</sub>), 1.16–1.04 (m, 27H; *i*Pr-CH<sub>3</sub>), 0.85 (br s, 3H; *i*Pr-CH<sub>3</sub>), 0.27 (d,  $^3J_{\text{H-H}} = 6.5$  Hz, 3H; *i*Pr-CH<sub>3</sub>), 0.16 (d,  $^3J_{\text{H-H}} = 6.5$  Hz, 3H; *i*Pr-CH<sub>3</sub>), 0.14 (broad s, 3H; *i*Pr-CH<sub>3</sub>), –0.02 (d,  $^3J_{\text{H-H}} = 6.45$  Hz, 3H; *i*Pr-CH<sub>3</sub>).

$^{13}\text{C}\{^1\text{H}\}$  (125.8 MHz, [D<sub>8</sub>]-THF, 238 K):  $\delta$  (ppm) 156.0 (br, Tip-C), 155.8 (Tip-C), 154.1 (Tip-C), 153.9 (Tip-C), 153.4 (Tip-C), 153.2 (Tip-C), 148.1 (Tip-C), 147.0 (Tip-C), 146.9 (Tip-C), 145.7 (d,  $J_{\text{C-P}} = 7.0$  Hz, Tip-C), 145.4 (Tip-C), 145.2 (Tip-C), 144.5 (Tip-C), 141.9 (Tip-C), 122.3 (Tip-CH), 120.6 (Tip-CH), 120.5 (br, Tip-CH), 120.2 (Tip-CH), 119.9 (Tip-CH), 119.8 (Tip-CH), 70.9 (crown-CH), 37.4 (br, *i*Pr-CH), 35.7 (*i*Pr-CH), 35.5 (*i*Pr-CH), 35.2 (*i*Pr-CH), 35.1 (br, *i*Pr-CH), 35.1 (*i*Pr-CH), 34.1 (*i*Pr-CH), 33.9 (*i*Pr-CH), 31.4 (d,  $J_{\text{C-P}} = 10.8$  Hz), 28.0 (*i*Pr-CH<sub>3</sub>), 27.0 (*i*Pr-CH<sub>3</sub>), 26.5 (*i*Pr-CH<sub>3</sub>), 26.3 (*i*Pr-CH<sub>3</sub>), 26.2 (*i*Pr-CH<sub>3</sub>), 26.1 (*i*Pr-CH<sub>3</sub>), 25.4\* (*i*Pr-CH<sub>3</sub>), 24.9 (*i*Pr-CH<sub>3</sub>), 24.9 (*i*Pr-CH<sub>3</sub>), 24.7 (*i*Pr-CH<sub>3</sub>), 24.6–24.5 (m, *i*Pr-CH<sub>3</sub>), 24.5 (*i*Pr-CH<sub>3</sub>), 24.2 (*i*Pr-CH<sub>3</sub>), 23.9 (*i*Pr-CH<sub>3</sub>), 23.5 (*i*Pr-CH<sub>3</sub>), 22.3 (*i*Pr-CH<sub>3</sub>) (\* Obscured by solvent). UV-Vis (THF):  $\lambda_{\text{max}}(\epsilon) = 594$  nm (4697), 362 nm (7556). ESI-MS (THF, negative mode):  $m/z$  928.11 [ $\text{Si}_3\text{Tip}_4\text{P}$ ]<sup>–</sup> (100%\*).

**Single crystal X-ray structure determination:** Single-crystal X-ray diffraction data were collected using either an Oxford Diffraction Supernova dual-source diffractometer equipped with a 135 mm Atlas CCD area detector. Crystals were selected under Paratone-N oil, mounted on micromount loops and quench-cooled using an Oxford Cryosystems open flow

N<sub>2</sub> cooling device. Data were collected at 150 K using mirror monochromated Cu K<sub>α</sub> radiation ( $\lambda = 1.5418 \text{ \AA}$ ; Oxford Diffraction Supernova) and processed using the CrysAlisPro package, including unit cell parameter refinement and inter-frame scaling (which was carried out using SCALE3 ABSPACK within CrysAlisPro).<sup>[3]</sup> Equivalent reflections were merged and diffraction patterns processed with the CrysAlisPro suite. Structures were subsequently solved using direct methods and refined on  $F^2$  using the SHELXL 2014-3 package.<sup>[4]</sup>

**Additional characterization techniques:** <sup>1</sup>H, <sup>13</sup>C, <sup>31</sup>P and <sup>29</sup>Si NMR spectra were acquired at 499.9, 125.8, 202.4 and 99.2 MHz, respectively, on a Bruker AVIII 500 MHz NMR Spectrometer. <sup>1</sup>H and <sup>13</sup>C NMR spectra were referenced to the most downfield solvent resonance (<sup>1</sup>H NMR [D<sub>8</sub>]-THF:  $\delta = 3.58 \text{ ppm}$ ; <sup>13</sup>C NMR [D<sub>8</sub>]THF:  $\delta = 67.2 \text{ ppm}$ ). <sup>31</sup>P and <sup>29</sup>Si spectra were externally referenced to an 85% solution of H<sub>3</sub>PO<sub>4</sub> in H<sub>2</sub>O ( $\delta = 0 \text{ ppm}$ ) and TMS ( $\delta = 0 \text{ ppm}$ ), respectively.

Positive and negative ion mode electrospray ionization mass spectra were recorded on DMF solutions (10–20  $\mu\text{M}$ ) on a Waters LCT Time of Flight mass spectrometer with a Z-spray source (150°C source temperature, 200°C desolvation temperature, 2.4 kV capillary voltage and 25 V cone voltage). The samples were made up inside a glovebox under an inert atmosphere and rapidly transferred to the spectrometer in an air-tight syringe. Samples were introduced directly with a 1 mL SGE syringe and a syringe pump at 0.6 mL h<sup>-1</sup>.

Elemental analyses were carried out by Elemental Microanalyses Ltd. (Devon, U.K.). Samples (approx. 5 mg) were submitted in sealed Pyrex ampoules.



## 2. Single crystal X-ray diffraction data

**Table S1.** Selected X-ray data collection and refinement parameters for [K(2,2,2-crypt)][**1**] $\cdot$ 2C<sub>6</sub>H<sub>6</sub> and [K(18-crown-6)][**2**] $\cdot$ 0.5C<sub>7</sub>H<sub>8</sub>.

|                                                  | [K(2,2,2-crypt)][ <b>1</b> ] $\cdot$ 2C <sub>6</sub> H <sub>6</sub>              | [K(18-crown-6)][ <b>2</b> ] $\cdot$ 0.5C <sub>7</sub> H <sub>8</sub> |
|--------------------------------------------------|----------------------------------------------------------------------------------|----------------------------------------------------------------------|
| Formula                                          | C <sub>91</sub> H <sub>140</sub> KN <sub>2</sub> O <sub>7</sub> PSi <sub>3</sub> | C <sub>75.5</sub> H <sub>120</sub> KO <sub>6</sub> PSi <sub>3</sub>  |
| Fw [g mol <sup>-1</sup> ]                        | 1528.38                                                                          | 1278.05                                                              |
| crystal system                                   | monoclinic                                                                       | monoclinic                                                           |
| space group                                      | <i>P</i> 2 <sub>1</sub> / <i>c</i>                                               | <i>I</i> 2/ <i>a</i>                                                 |
| <i>a</i> (Å)                                     | 19.9221(9)                                                                       | 24.4411(10)                                                          |
| <i>b</i> (Å)                                     | 17.6488(7)                                                                       | 27.2214(4)                                                           |
| <i>c</i> (Å)                                     | 26.6643(8)                                                                       | 25.0883(17)                                                          |
| $\beta$ (°)                                      | 102.440(3)                                                                       | 110.113(4)                                                           |
| <i>V</i> (Å <sup>3</sup> )                       | 9155.1(6)                                                                        | 15673.8(13)                                                          |
| <i>Z</i>                                         | 4                                                                                | 8                                                                    |
| radiation, $\lambda$ (Å)                         | Cu <i>K</i> $\alpha$ (1.54178)                                                   |                                                                      |
| <i>T</i> (K)                                     | 150(2)                                                                           |                                                                      |
| $\rho_{\text{calc}}$ (g cm <sup>-3</sup> )       | 1.109                                                                            | 1.083                                                                |
| $\mu$ (mm <sup>-1</sup> )                        | 1.439                                                                            | 1.576                                                                |
| reflections collected                            | 93580                                                                            | 128663                                                               |
| independent reflections                          | 16124                                                                            | 16356                                                                |
| parameters                                       | 1041                                                                             | 834                                                                  |
| R(int)                                           | 0.0458                                                                           | 0.0372                                                               |
| R1/wR2, <sup>[a]</sup> I $\geq$ 2 $\sigma$ I (%) | 5.89/15.06                                                                       | 3.73/9.79                                                            |
| R1/wR2, <sup>[a]</sup> all data (%)              | 7.01/15.78                                                                       | 4.28/10.34                                                           |
| GOF                                              | 1.051                                                                            | 1.030                                                                |

<sup>[a]</sup> R1 =  $[\sum||F_o| - |F_c||]/\sum|F_o|$ ; wR2 =  $\{[\sum w[(F_o)^2 - (F_c)^2]^2]/[\sum w(F_o)^2]\}^{1/2}$ ; w =  $[\sigma^2(F_o)^2 + (AP)^2 + BP]^{-1}$ , where P =  $[(F_o)^2 + 2(F_c)^2]/3$  and the A and B values are 0.0740 and 6.97 for [K(2,2,2-crypt)][**1**] $\cdot$ 2C<sub>6</sub>H<sub>6</sub> and 0.0512 and 11.68 for [K(18-crown-6)][**2**] $\cdot$ 0.5C<sub>7</sub>H<sub>8</sub>.

### 3. NMR spectra

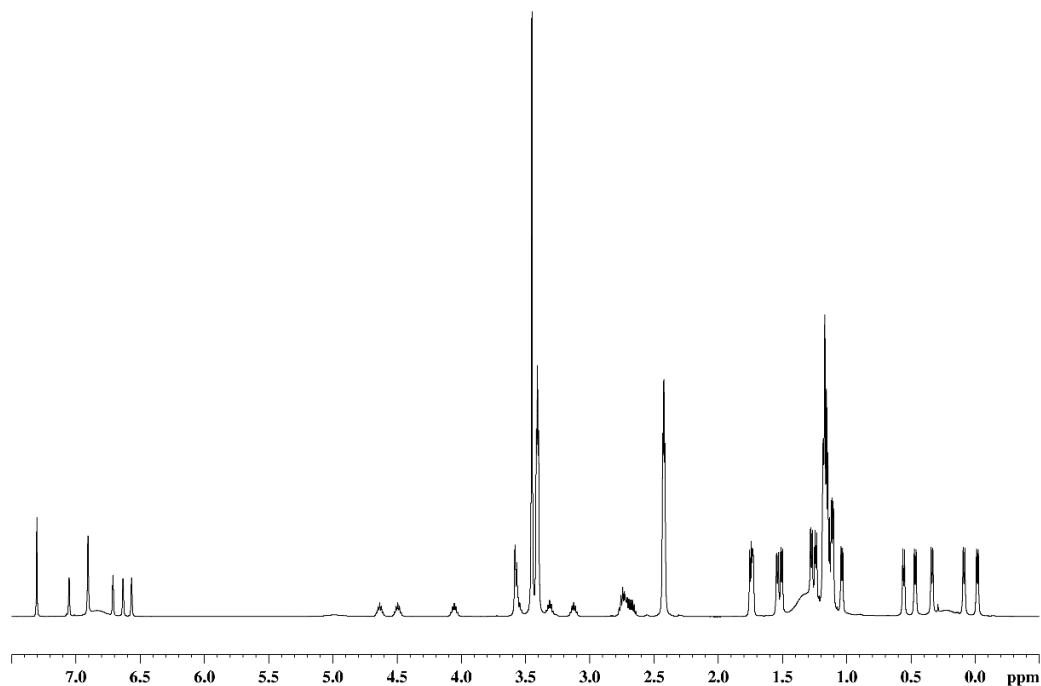

**Figure S1.** Room temperature <sup>1</sup>H NMR spectrum of [K(2,2,2-crypt)][1].

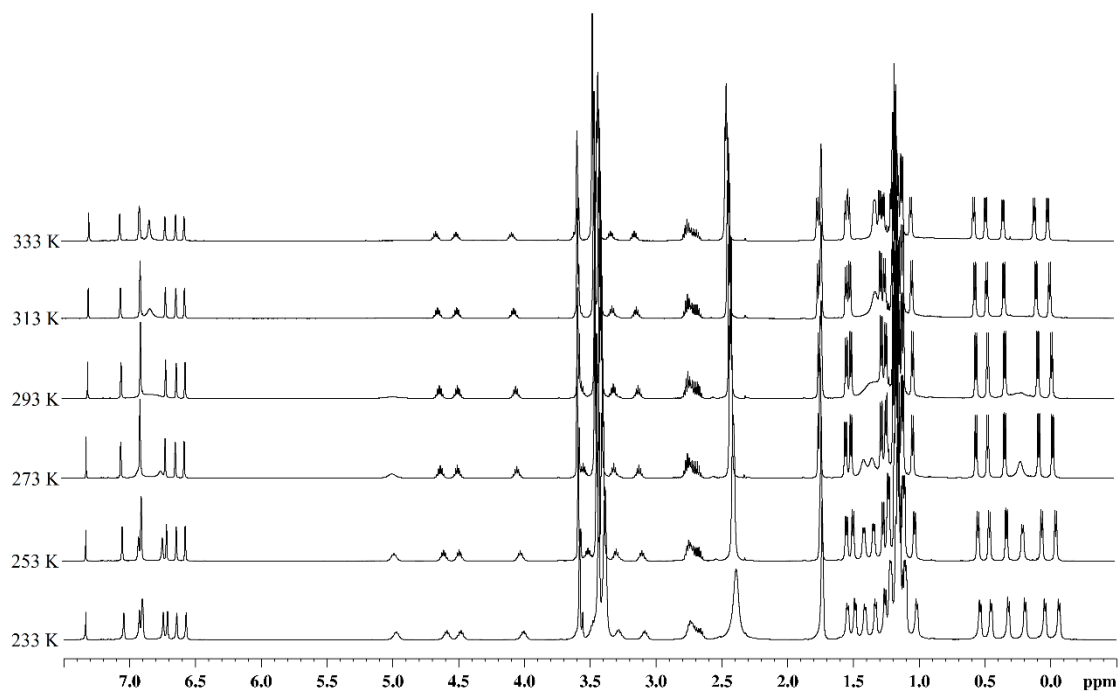

**Figure S2.** Variable temperature <sup>1</sup>H NMR spectra of [K(2,2,2-crypt)][1] ([D<sub>8</sub>]-THF).

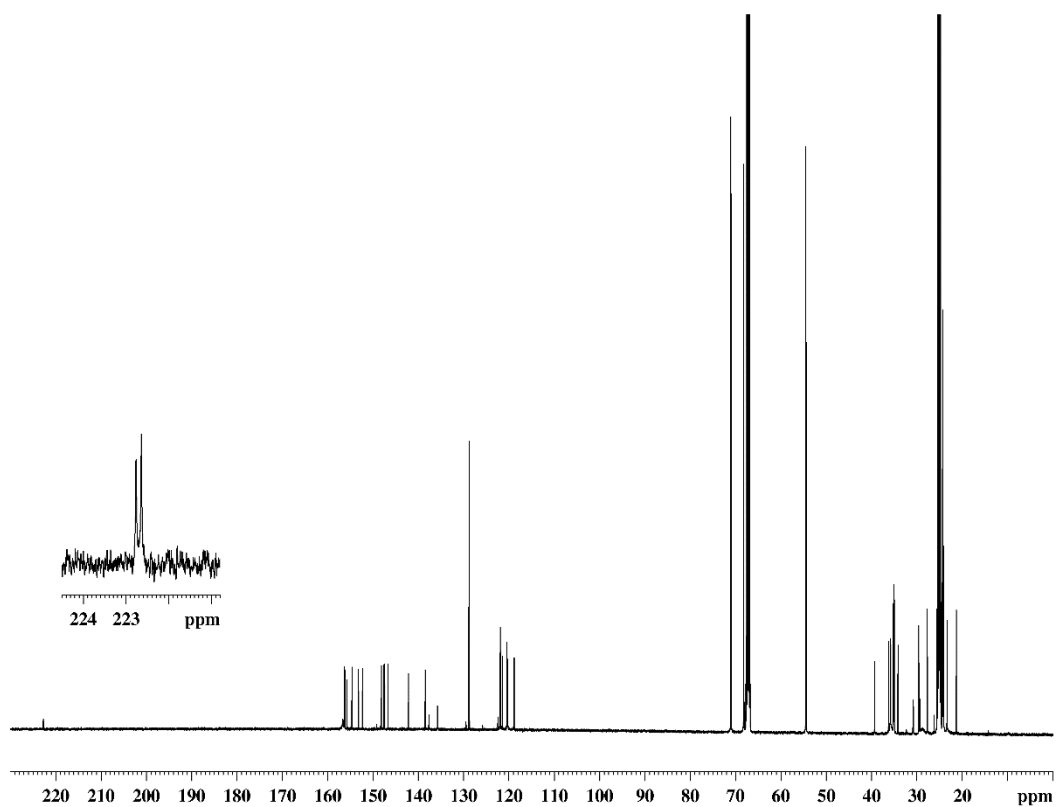

**Figure S3.** Room temperature  $^{13}\text{C}\{^1\text{H}\}$  NMR spectrum of  $[\text{K}(2,2,2\text{-crypt})][\mathbf{1}]$ .

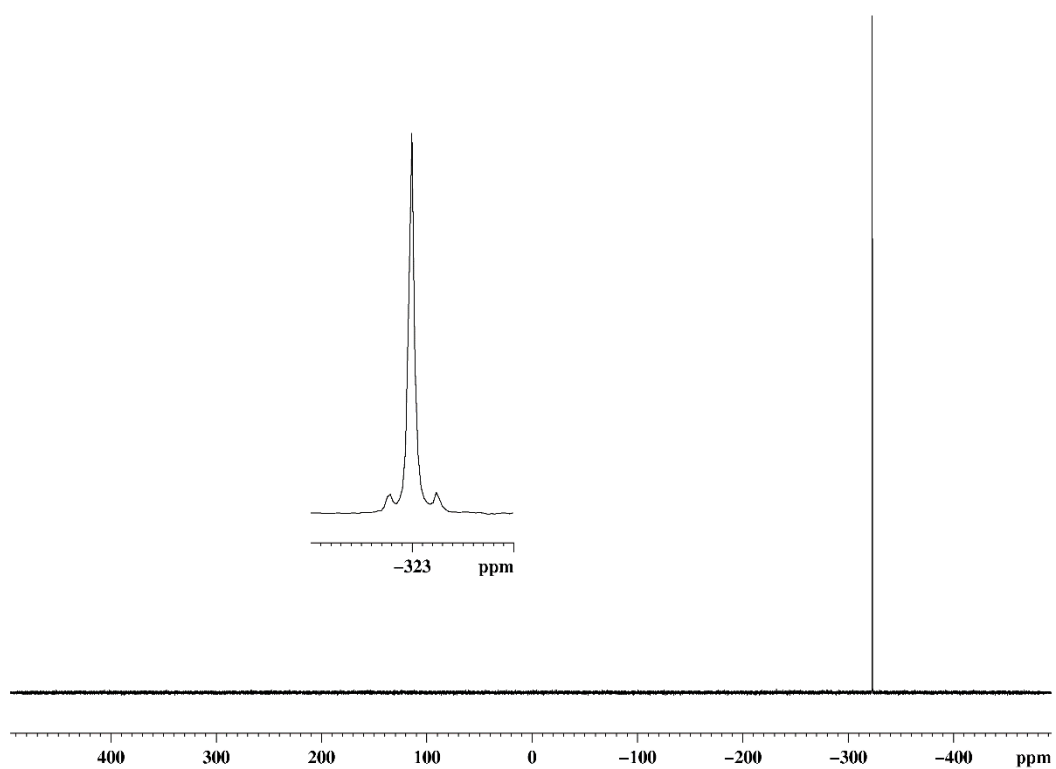

**Figure S4.** Room temperature  $^{31}\text{P}\{^1\text{H}\}$  NMR spectrum of  $[\text{K}(2,2,2\text{-crypt})][\mathbf{1}]$ .

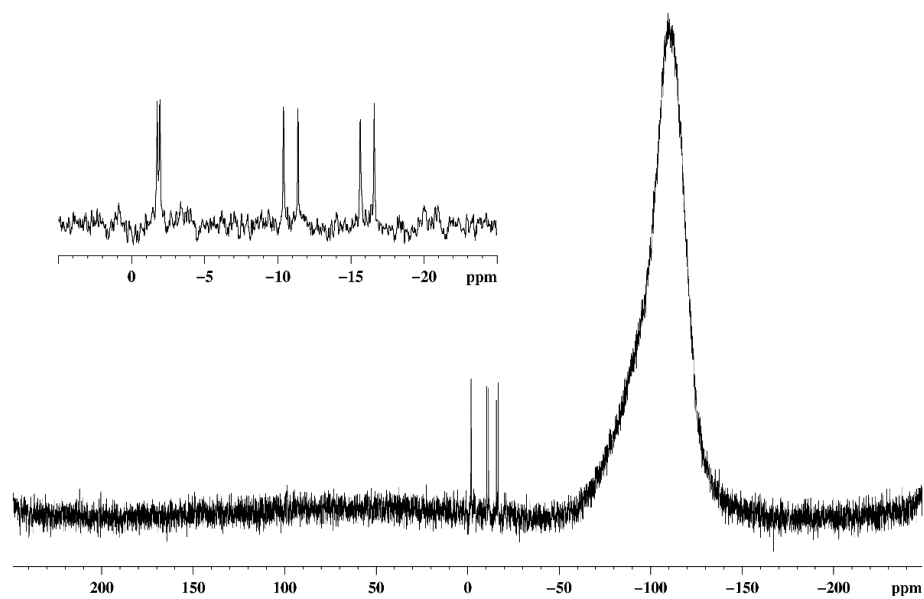

**Figure S5.** Room temperature  $^{29}\text{Si}\{^1\text{H}\}$  NMR spectrum of  $[\text{K}(2,2,2\text{-crypt})][\mathbf{1}]$ .

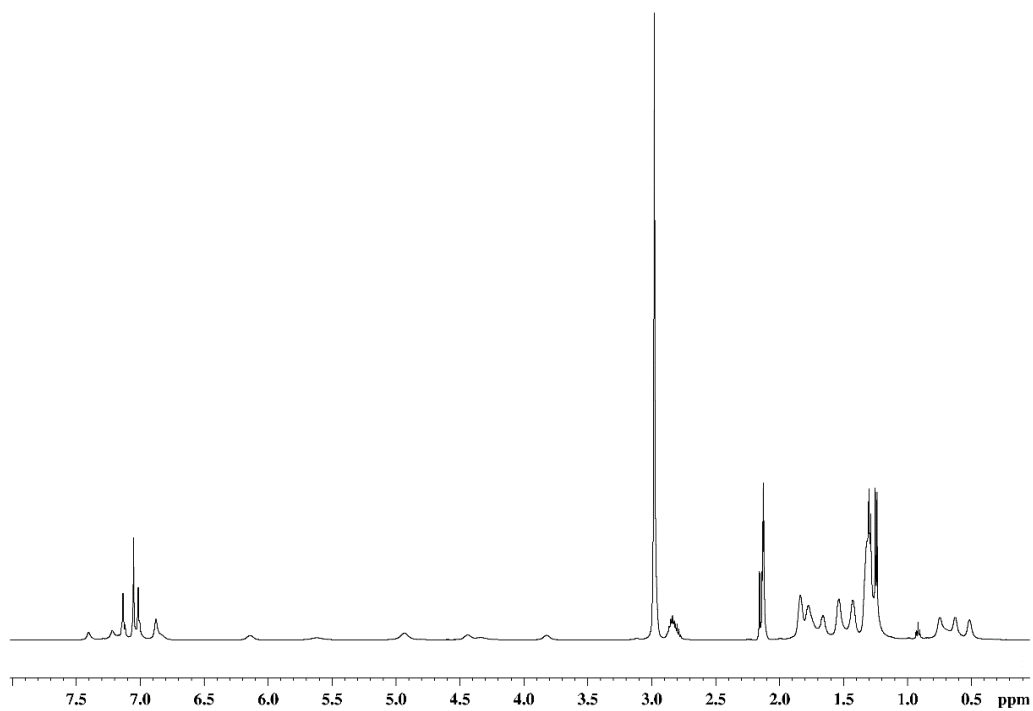

**Figure S6.** Room temperature  $^1\text{H}$  NMR spectrum of  $[\text{K}(18\text{-crown-6})][\mathbf{2}]$  ( $[\text{D}_8]\text{-tol}$ ).

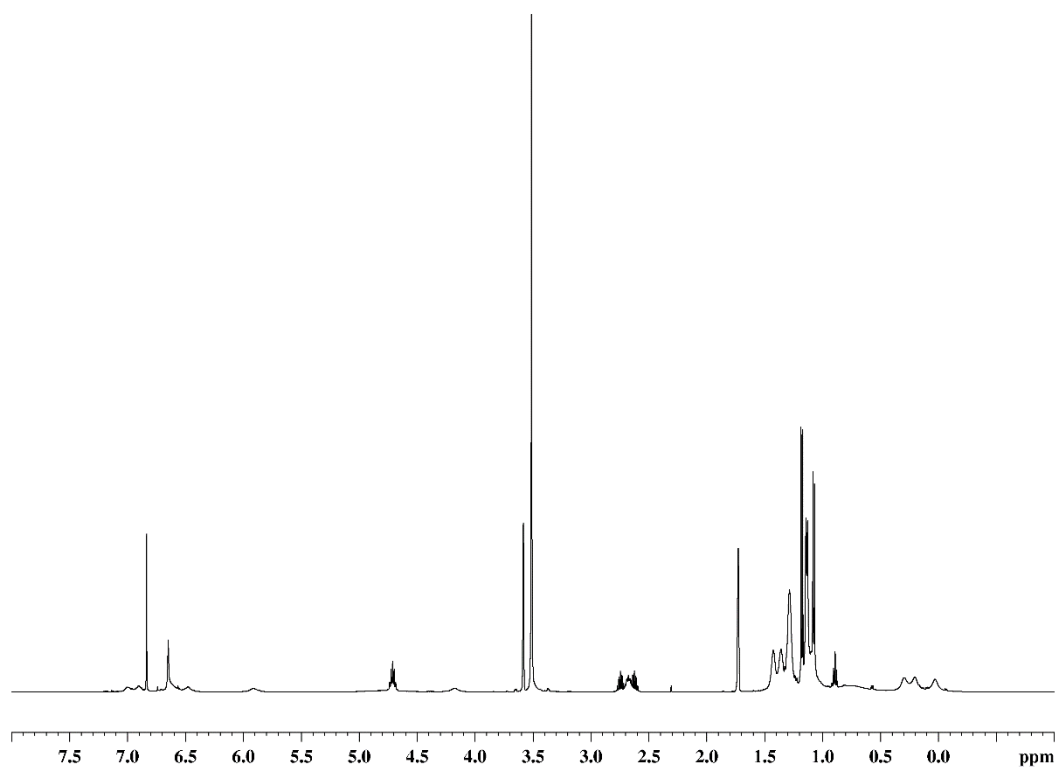

**Figure S7.** Room temperature <sup>1</sup>H NMR spectrum of [K(18-crown-6)][**2**] at ([D<sub>8</sub>]-THF).

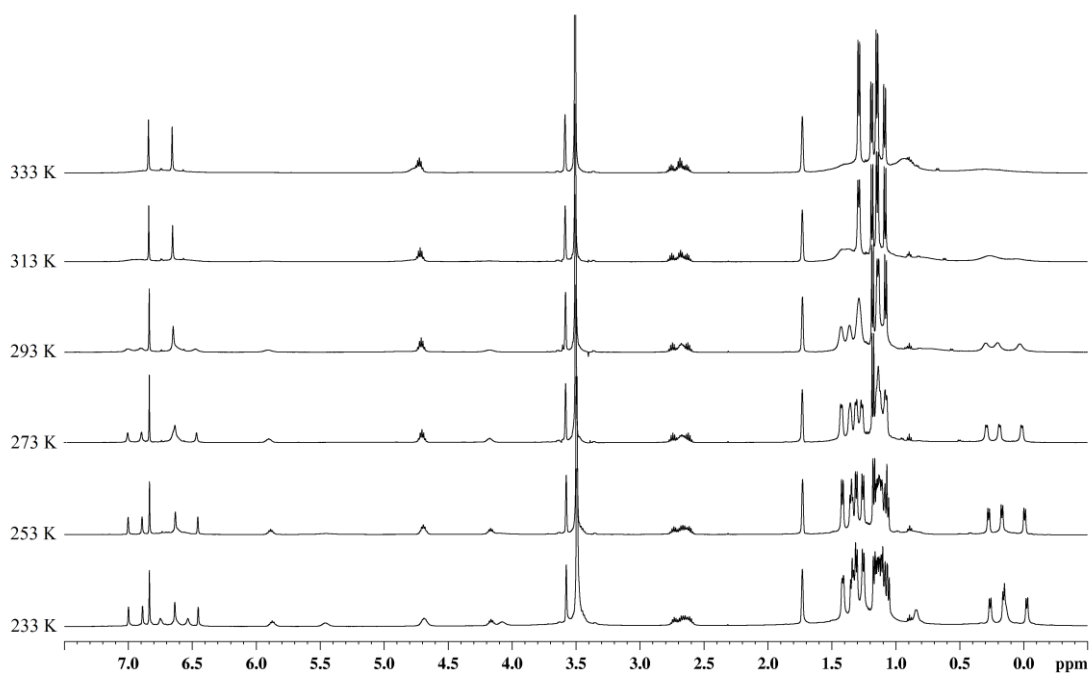

**Figure S8.** VT <sup>1</sup>H NMR spectra of [K(18-Crown-6)][**2**] ([D<sub>8</sub>]-THF).

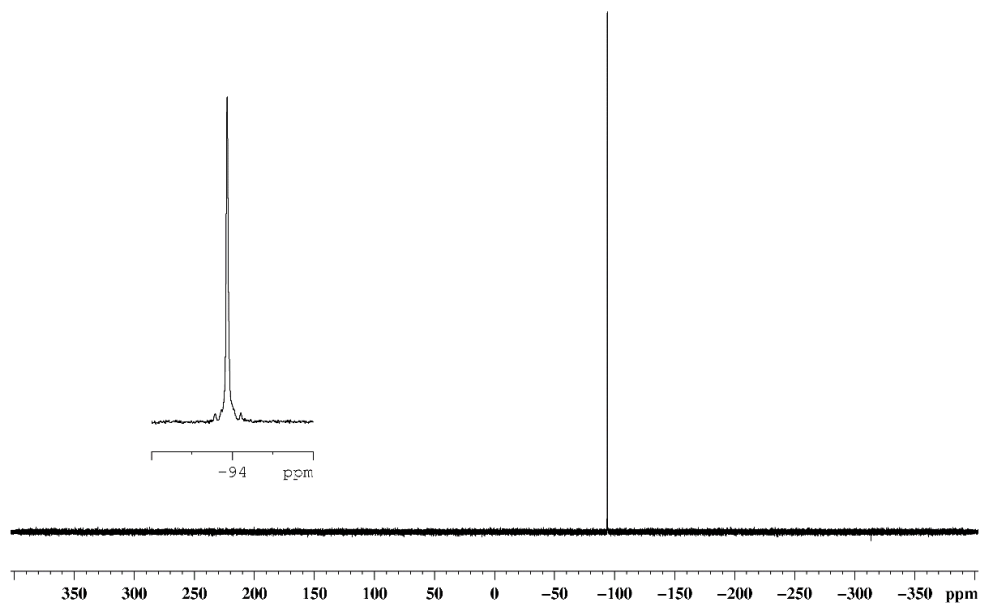

**Figure S9.** Room temperature  $^{31}\text{P}\{^1\text{H}\}$  NMR spectrum of  $[\text{K}(18\text{-crown-6})][\mathbf{2}]$  ( $[\text{D}_8]\text{-tol}$ ).

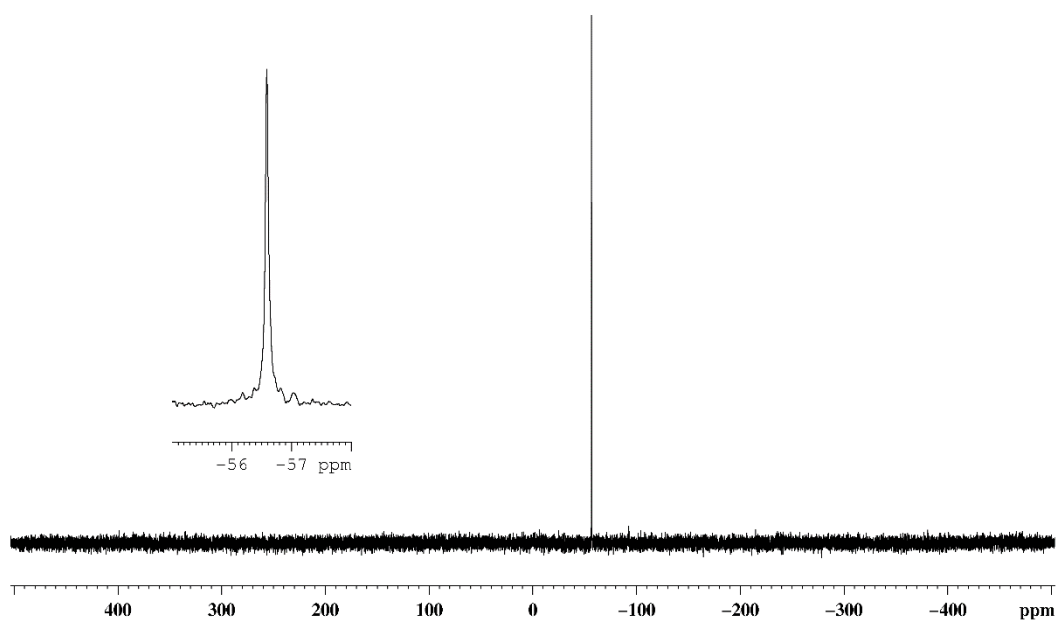

**Figure S10.** Room temperature  $^{31}\text{P}\{^1\text{H}\}$  NMR spectrum of  $[\text{K}(18\text{-crown-6})][\mathbf{2}]$  ( $[\text{D}_8]\text{-THF}$ ).

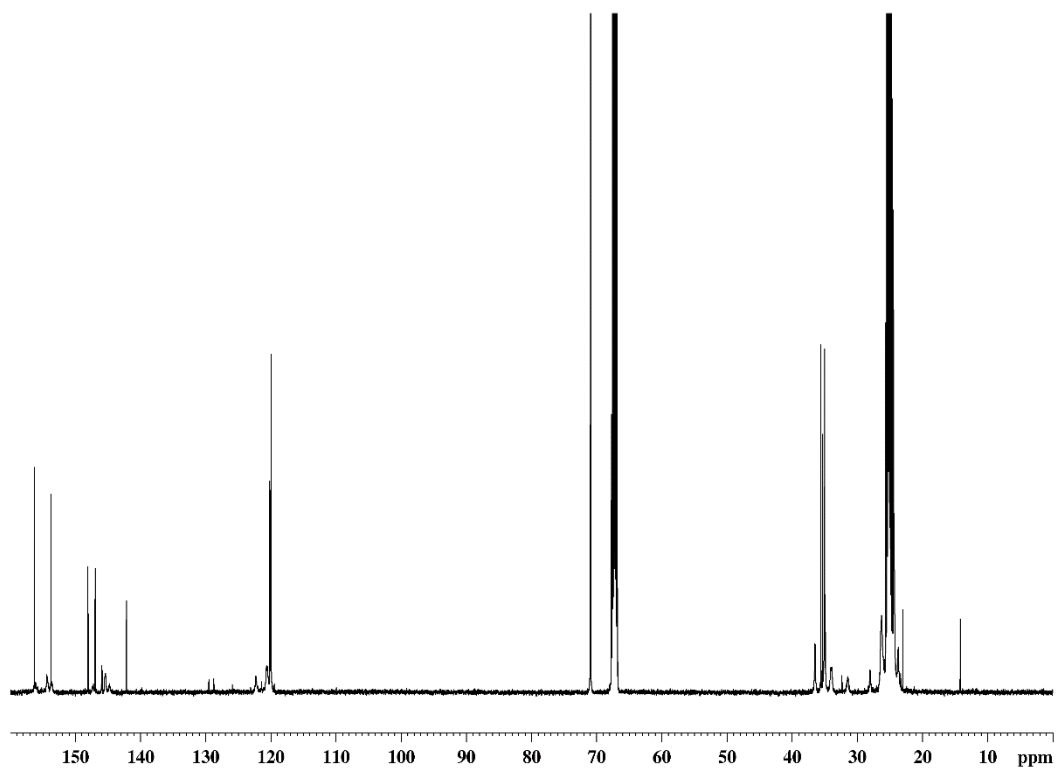

**Figure S11.** Room temperature  $^{13}\text{C}\{^1\text{H}\}$  NMR spectrum of  $[\text{K}(18\text{-crown-6})][\mathbf{2}]$  ( $[\text{D}_8]$ -THF).

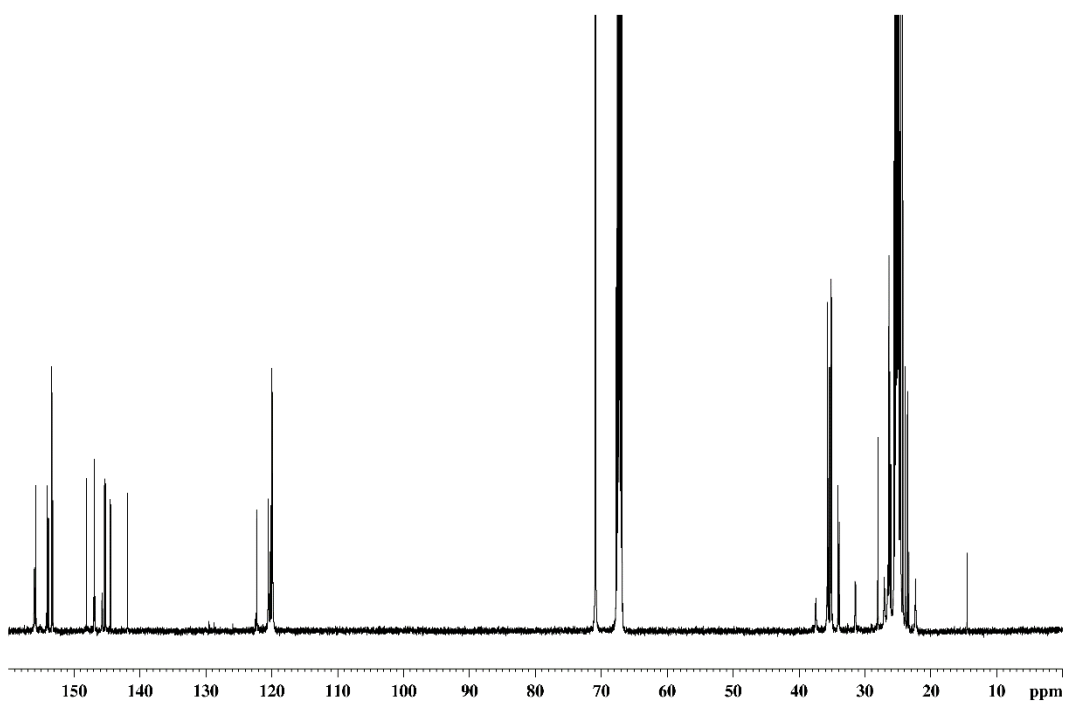

**Figure S12.**  $^{13}\text{C}\{^1\text{H}\}$  NMR spectrum of  $[\text{K}(18\text{-crown-6})][\mathbf{2}]$  at 238 K ( $[\text{D}_8]$ -THF).

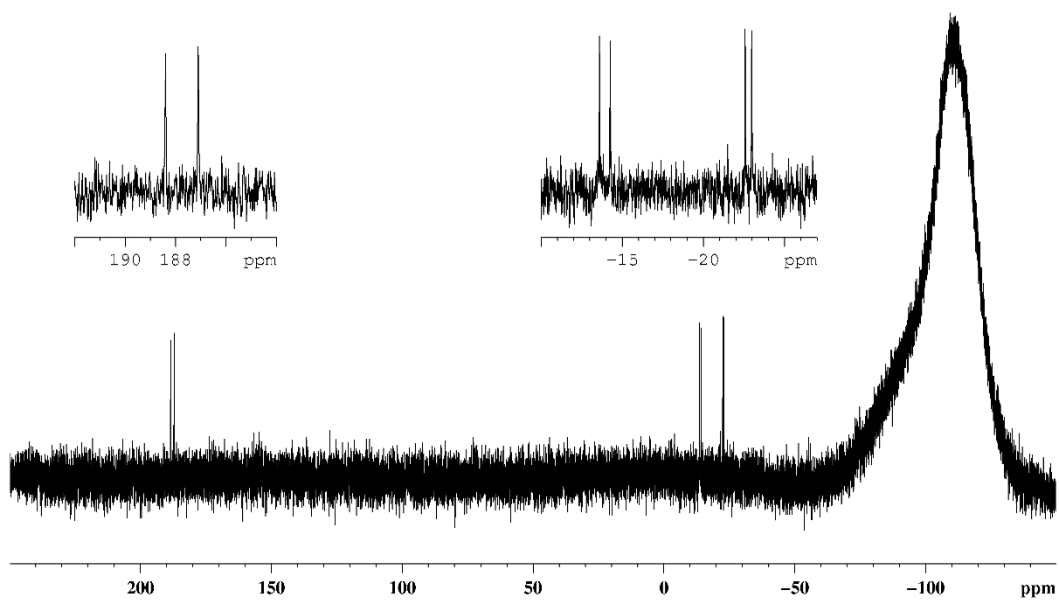

**Figure S13.**  $^{29}\text{Si}\{^1\text{H}\}$  NMR spectrum of  $[\text{K}(18\text{-crown-6})][\mathbf{2}]$  at 238 K ( $[\text{D}_8]\text{-THF}$ ).

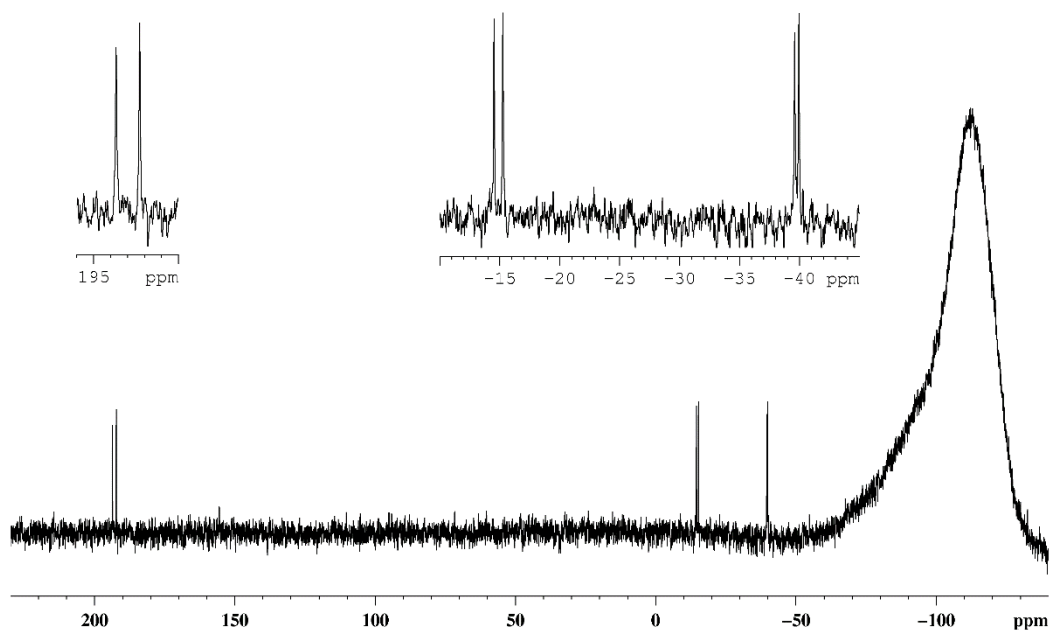

**Figure S14.**  $^{29}\text{Si}\{^1\text{H}\}$  NMR spectrum of  $[\text{K}(18\text{-crown-6})][\mathbf{2}]$  at 238 K ( $[\text{D}_8]\text{-THF}$ ).



#### 4. ESI-MS spectra

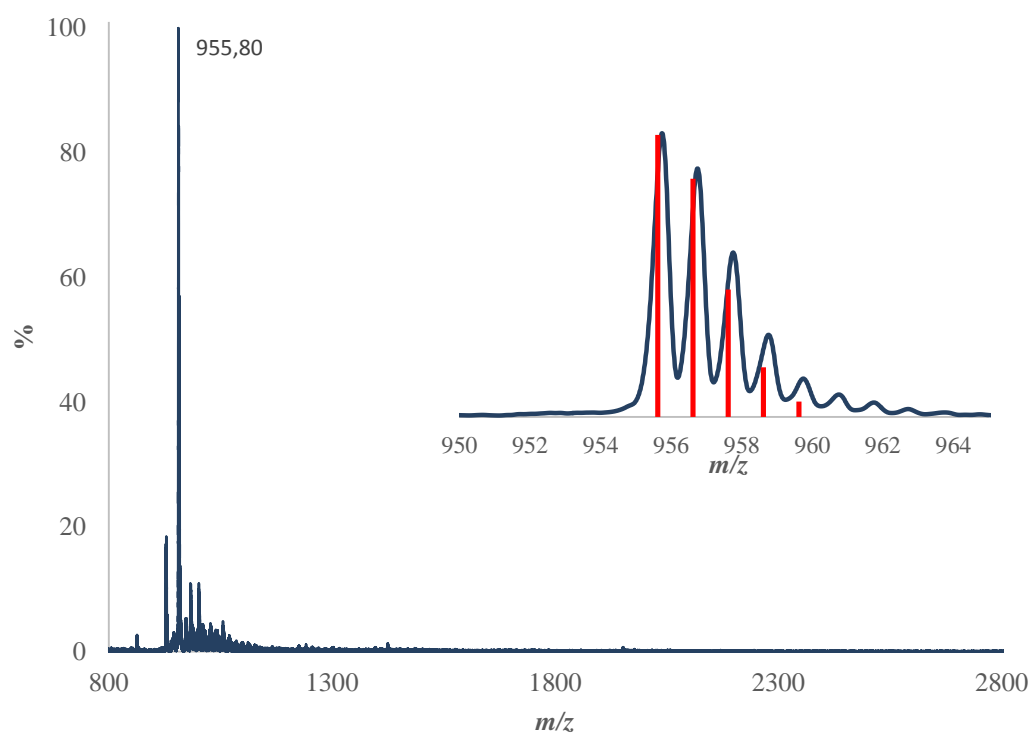

**Figure S15.** Negative mode ESI-mass spectrum of  $[K(2,2,2\text{-crypt})][1]$  in THF.

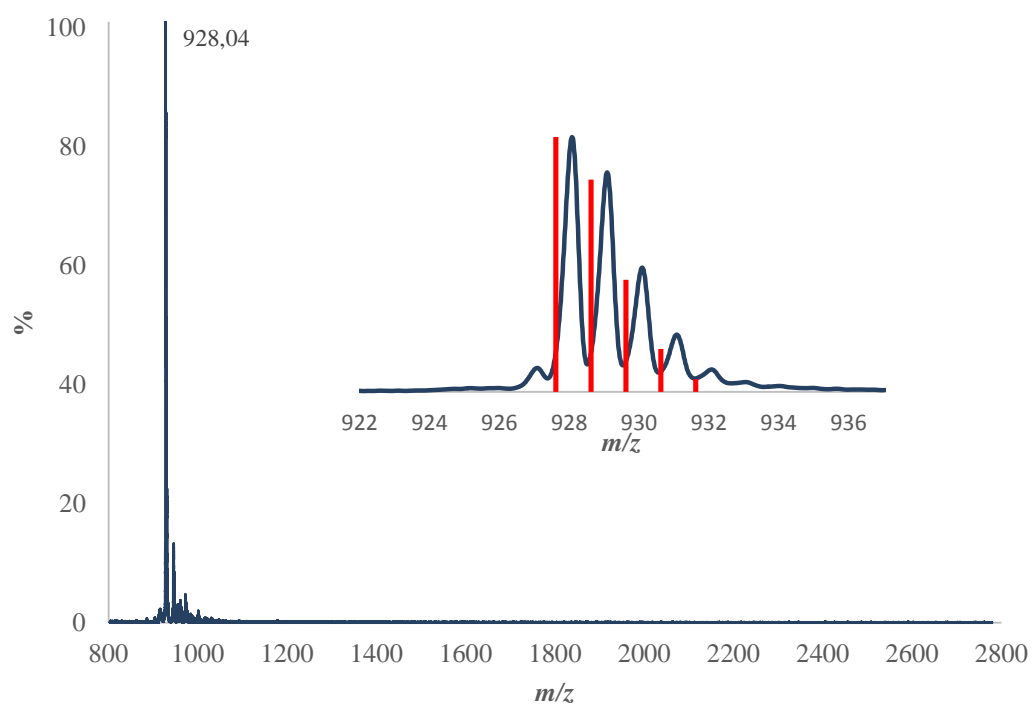

**Figure S16.** Negative mode ESI-mass spectrum of  $[K(18\text{-crown-6})][2]$  in THF.

## 5. UV-Vis spectra

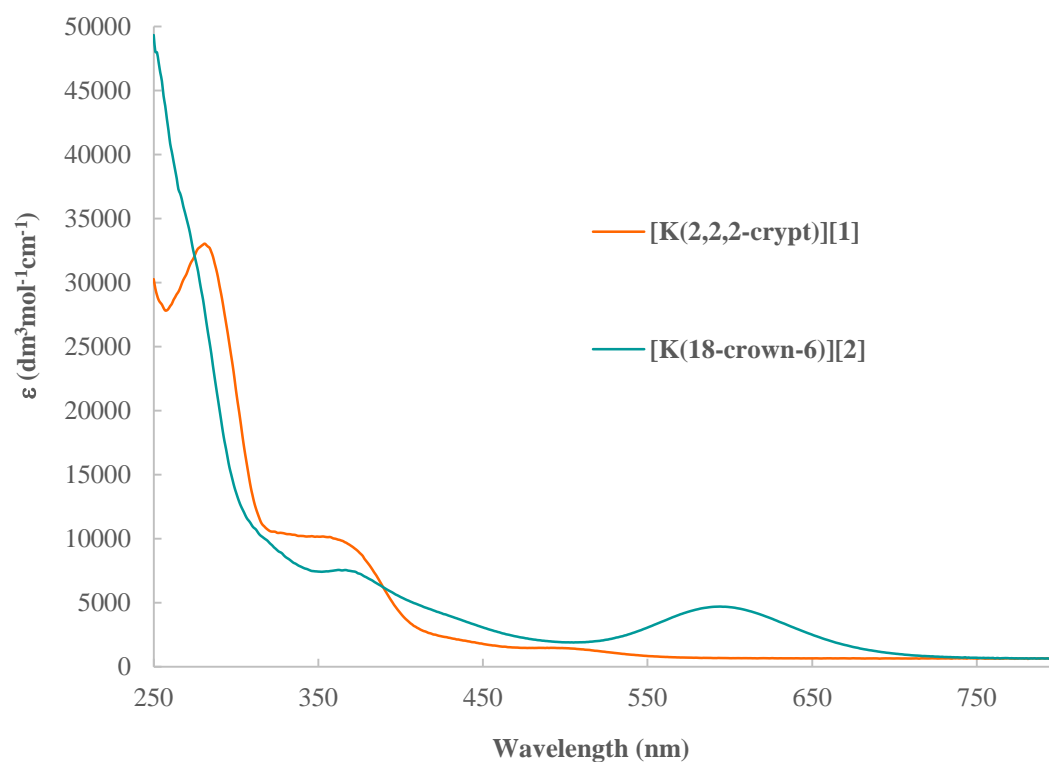

**Figure S17.** Electronic absorption spectra for [K(2,2,2-crypt)][1] (orange) and [K(18-crown-6)][2] (blue).

## 6. IR spectrum

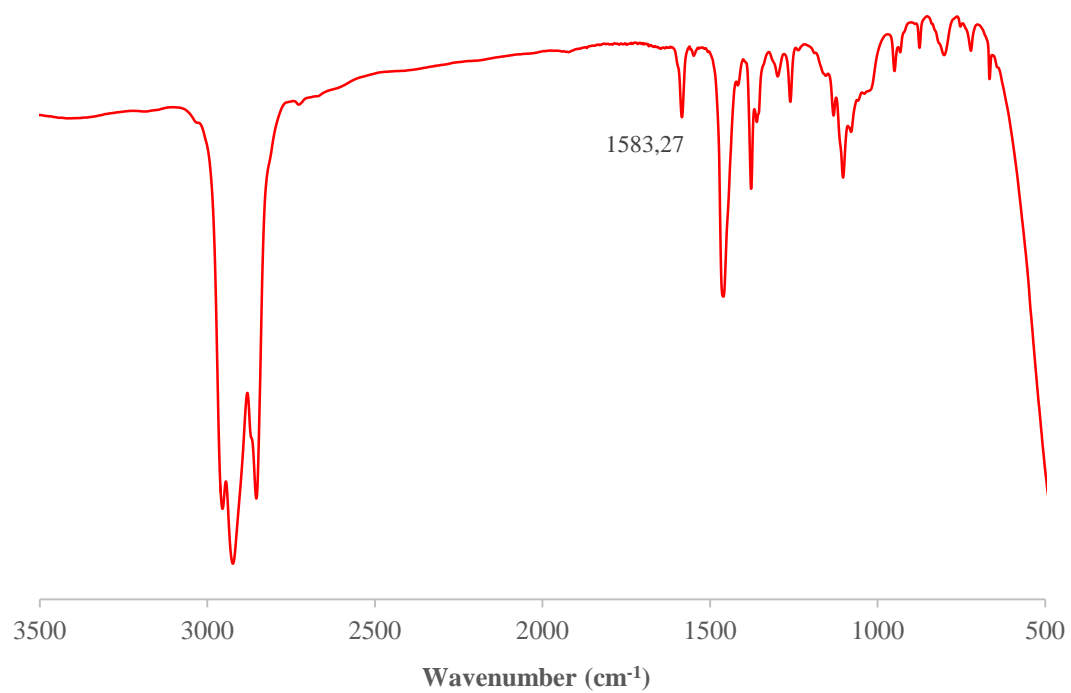

**Figure S17.** Infrared spectrum of [K(2,2,2-crypt)][1] recorded as a Nujol mull.

## 7. Computational details

### Complete reference [22]:

Gaussian 09, Revision D.01, M. J. Frisch, G. W. Trucks, H. B. Schlegel, G. E. Scuseria, M. A. Robb, J. R. Cheeseman, G. Scalmani, V. Barone, B. Mennucci, G. A. Petersson, H. Nakatsuji, M. Caricato, X. Li, H. P. Hratchian, A. F. Izmaylov, J. Bloino, G. Zheng, J. L. Sonnenberg, M. Hada, M. Ehara, K. Toyota, R. Fukuda, J. Hasegawa, M. Ishida, T. Nakajima, Y. Honda, O. Kitao, H. Nakai, T. Vreven, J. A. Montgomery, Jr., J. E. Peralta, F. Ogliaro, M. Bearpark, J. J. Heyd, E. Brothers, K. N. Kudin, V. N. Staroverov, T. Keith, R. Kobayashi, J. Normand, K. Raghavachari, A. Rendell, J. C. Burant, S. S. Iyengar, J. Tomasi, M. Cossi, N. Rega, J. M. Millam, M. Klene, J. E. Knox, J. B. Cross, V. Bakken, C. Adamo, J. Jaramillo, R. Gomperts, R. E. Stratmann, O. Yazyev, A. J. Austin, R. Cammi, C. Pomelli, J. W. Ochterski, R. L. Martin, K. Morokuma, V. G. Zakrzewski, G. A. Voth, P. Salvador, J. J. Dannenberg, S. Dapprich, A. D. Daniels, O. Farkas, J. B. Foresman, J. V. Ortiz, J. Cioslowski, and D. J. Fox, Gaussian, Inc., Wallingford CT, 2013.

### $\mathbf{1}_{\text{calc}}$ at $\omega$ B97XD/6-311g(d,p)

#### Frequencies not calculated

|    |               |               |               |
|----|---------------|---------------|---------------|
| Si | 0.0192077289  | 0.0192141221  | 0.0213898383  |
| Si | -1.6427488617 | -1.4365851868 | 0.8215780658  |
| Si | -1.6378655538 | 1.1235794961  | 1.3202390434  |
| C  | -2.8761158156 | 0.0326790213  | 0.2880103461  |
| P  | -1.787990859  | -0.5061106979 | 2.8478689785  |
| O  | -3.969853988  | 0.1241211257  | -0.2160711871 |
| C  | 0.4613895081  | -1.9054314771 | -6.6465919103 |
| C  | 2.4006528151  | -0.2836971744 | -6.5482167344 |
| C  | 0.937167935   | -0.5290483207 | -6.1663529789 |
| C  | 0.7061318515  | -0.3643254952 | -4.6779713115 |
| C  | -0.2023835273 | 0.5614505881  | -4.1924323204 |
| C  | 1.3614485883  | -1.1678321073 | -3.7543931225 |
| C  | -2.0277551452 | -2.5627236512 | -3.4632597981 |
| C  | -1.1211222766 | 3.1698558852  | -2.8917901364 |
| C  | -2.8824932768 | 1.3772217336  | -2.9536700762 |
| C  | -0.4534621375 | 0.7152725916  | -2.8287436306 |
| C  | -1.4919441112 | 1.7554247308  | -2.431648575  |

|   |               |               |               |
|---|---------------|---------------|---------------|
| C | 1.1281009124  | -1.0598292674 | -2.3872591202 |
| C | 2.5179730061  | 2.3829541908  | -2.1444163618 |
| C | -4.1266127604 | -2.4152554232 | -2.073936695  |
| C | -2.5935466415 | -2.4391200588 | -2.0459055207 |
| C | 0.2295261029  | -0.0863597507 | -1.8916989715 |
| C | 1.5914038587  | -3.4909746072 | -1.8205148584 |
| C | 3.3865839159  | -1.7278751104 | -1.4905251058 |
| C | 1.8827454908  | -2.0248420206 | -1.4804627623 |
| C | -2.0707805422 | -4.8341138175 | -1.5590521582 |
| C | 1.8091971779  | 2.4851785728  | -0.7880430805 |
| C | -1.5930299857 | -7.2994810515 | -1.3040200488 |
| C | -2.5174269276 | -8.2703579204 | -0.5616063502 |
| C | -2.1162745062 | -3.5213967514 | -1.0886814636 |
| C | -4.221519497  | 4.3793159099  | -0.6688613521 |
| C | 1.7693338938  | 3.9352062767  | -0.2923925469 |
| C | -1.685825261  | -5.8910098152 | -0.7511541957 |
| C | -0.144167224  | -7.8013897712 | -1.2964830652 |
| C | 2.4343294268  | 1.5294102053  | 0.2217342953  |
| C | -3.6439010521 | 3.374693521   | 0.3284136409  |
| C | 3.7352505947  | 1.8218532932  | 0.6280981797  |
| C | -1.7743984288 | -3.2464082553 | 0.2518782873  |
| C | 1.7719734647  | 0.3848057452  | 0.7242602946  |
| C | -1.3698228726 | -5.6168566136 | 0.5753199321  |
| C | -4.7389922506 | 2.8952309668  | 1.2917285518  |
| C | 4.4127137184  | 1.0429007119  | 1.5506767695  |
| C | -1.4128768582 | -4.3259894645 | 1.0919804021  |
| C | -2.4468615396 | 3.883320986   | 1.1208135604  |
| C | 2.4587070803  | -0.4069497553 | 1.6712999452  |
| C | 5.8128992872  | 1.4028766508  | 2.003550075   |
| C | 6.8133748376  | 0.2827452348  | 1.6985294387  |
| C | -1.561165308  | 2.9717459242  | 1.7284335587  |
| C | -2.2642699895 | 5.2504333069  | 1.3188732483  |
| C | 3.7492945255  | -0.0616544609 | 2.0642204576  |
| C | 2.6868636062  | -2.9054078641 | 2.0557779922  |
| C | 1.8580517691  | -1.6435030839 | 2.3200839187  |
| C | 0.2551833653  | 7.6765170117  | 1.5556973616  |
| C | -1.1267326007 | -4.114794077  | 2.5718669745  |
| C | -0.5459739867 | 3.4598481365  | 2.5787739158  |
| C | -1.241839001  | 5.7436762704  | 2.1205579735  |
| C | 5.8349284477  | 1.7767499202  | 3.4902182673  |
| C | 1.8129128675  | 2.9819027243  | 3.4820399253  |
| C | -0.4075537514 | 4.8336368915  | 2.7580749626  |
| C | -0.1729799892 | -5.1447938611 | 3.1821584857  |
| C | 0.3593122633  | 2.5191164658  | 3.3621855846  |
| C | -1.0300465353 | 7.2377731092  | 2.2691493972  |
| C | -2.4436878979 | -4.0843268218 | 3.3591610314  |
| C | 1.6584951174  | -1.4335515355 | 3.8240271397  |
| C | -1.0239038476 | 7.6843871399  | 3.7346191373  |
| C | -0.2410206858 | 2.2691393493  | 4.7513016624  |
| H | 0.5622789139  | -1.9982957583 | -7.7328791553 |
| H | 2.5375680126  | -0.3501164693 | -7.6324224806 |
| H | 0.3294688623  | 0.2293664662  | -6.6738900409 |
| H | -0.5845016063 | -2.0712937848 | -6.3767615921 |
| H | 2.7295180957  | 0.7043784154  | -6.2167538928 |
| H | 3.0558304675  | -1.0262449616 | -6.0826030375 |
| H | 1.0520388304  | -2.7020009807 | -6.1835294253 |

|   |               |               |               |
|---|---------------|---------------|---------------|
| H | -0.7410959389 | 1.1825811088  | -4.9036827995 |
| H | -1.0982018493 | 3.2402752066  | -3.9842170899 |
| H | 2.0651398427  | -1.9161952288 | -4.1085911349 |
| H | -2.9044348692 | 1.3905342371  | -4.0488957737 |
| H | -2.2596755428 | -1.6538440418 | -4.02563691   |
| H | -2.4633905377 | -3.4080076544 | -4.0068221052 |
| H | -0.9420143646 | -2.6743017349 | -3.4562258588 |
| H | 2.0206137844  | 3.0094646946  | -2.8911593844 |
| H | -4.4834056354 | -1.6335528621 | -2.7514785924 |
| H | -0.1448251468 | 3.4751411567  | -2.5137537685 |
| H | -1.8617706457 | 3.8860927284  | -2.5268654462 |
| H | 1.9319809946  | -3.7510321675 | -2.8282231757 |
| H | -3.6310114264 | 2.0870630783  | -2.5900867476 |
| H | 2.5156008515  | 1.3557268532  | -2.5148646696 |
| H | -3.1812316391 | 0.3873220891  | -2.6095335    |
| H | 3.8068069426  | -1.8775060329 | -2.4909071394 |
| H | -4.5129615637 | -3.380092992  | -2.4226964171 |
| H | 3.5580906687  | 2.7165329174  | -2.0631317512 |
| H | -2.3315970087 | -5.0364469685 | -2.5936165594 |
| H | -1.9251993812 | -7.2584603201 | -2.347976057  |
| H | -2.2536639476 | -1.4754038229 | -1.6635010176 |
| H | 0.5224264135  | -3.7043998877 | -1.7522950036 |
| H | -3.5510719926 | -7.9162090745 | -0.5813194782 |
| H | -1.5415106685 | 1.7739766179  | -1.3408757378 |
| H | -4.9639341978 | 3.8818231001  | -1.2990456847 |
| H | -4.5315734015 | -2.2010786622 | -1.084698928  |
| H | 3.5855079575  | -0.6981396426 | -1.1842064181 |
| H | -2.4824546813 | -9.2655813352 | -1.0167385104 |
| H | 1.2953322977  | 4.5739953134  | -1.0446348176 |
| H | 2.1083345681  | -4.1500597134 | -1.1154964653 |
| H | -3.4489545222 | 4.798230766   | -1.3194936878 |
| H | 0.7690440892  | 2.1946607309  | -0.9315971274 |
| H | 3.9179050619  | -2.3905673381 | -0.8007671512 |
| H | -0.0720527061 | -8.7976224062 | -1.745259143  |
| H | 1.5268806906  | -1.8826065067 | -0.4598248134 |
| H | -4.7262722076 | 5.2099783114  | -0.1638219836 |
| H | 2.7720906247  | 4.3337583998  | -0.1076434439 |
| H | 0.5048880901  | -7.1211674136 | -1.8535582936 |
| H | 4.2337510743  | 2.6976306022  | 0.2212212696  |
| H | -3.3317916731 | 2.4988777263  | -0.245539731  |
| H | -2.2195479887 | -8.3716195142 | 0.4865592142  |
| H | 1.1874946917  | 4.0229553611  | 0.6264562208  |
| H | -5.5803905261 | 2.4798878929  | 0.7318888586  |
| H | 0.2392746545  | -7.8637712882 | -0.2733529502 |
| H | 6.1200202687  | 2.2879926523  | 1.4339052022  |
| H | 2.7562585174  | -3.1261370633 | 0.9888373255  |
| H | 6.8067735778  | 0.0340723948  | 0.6343266121  |
| H | -5.0937173714 | 3.7300644975  | 1.9069401283  |
| H | -1.0763496339 | -6.4357886584 | 1.2234652648  |
| H | -2.9312025475 | 5.9589995016  | 0.8379698006  |
| H | -4.3670806855 | 2.1116182542  | 1.9555941208  |
| H | 0.8673335656  | -1.7963372703 | 1.8888297564  |
| H | 7.8289528573  | 0.5786477182  | 1.9810647106  |
| H | 0.2343258991  | 7.383561067   | 0.5031373648  |
| H | 3.7055890618  | -2.8086675101 | 2.4449946857  |
| H | 2.2413977957  | 3.2227601569  | 2.5081994944  |

|   |               |               |              |
|---|---------------|---------------|--------------|
| H | 1.1293787115  | 7.2040819582  | 2.0143829547 |
| H | 2.2257622264  | -3.7646739447 | 2.5482108187 |
| H | 4.2525699533  | -0.680618092  | 2.801663119  |
| H | 6.5627810077  | -0.6268074259 | 2.2531355822 |
| H | 5.1331670724  | 2.5885292799  | 3.6971504491 |
| H | 0.7110034353  | -5.2978105511 | 2.5580598533 |
| H | -0.6623104129 | -3.1316704998 | 2.6887806408 |
| H | 0.3779077659  | 1.5563291476  | 2.8452541959 |
| H | -1.8729995021 | 7.734315543   | 1.774179832  |
| H | 6.8361732751  | 2.0935351558  | 3.800273538  |
| H | -3.1106879207 | -3.3077127858 | 2.981290798  |
| H | 0.3849766278  | 8.7623760918  | 1.6136451637 |
| H | -0.6586386182 | -6.1162903993 | 3.3247989991 |
| H | 2.4141217565  | 2.1758294945  | 3.9127906711 |
| H | -2.9525990665 | -5.0521150051 | 3.282111598  |
| H | 5.5452393645  | 0.9219732611  | 4.1092340778 |
| H | 1.9148010404  | 3.8563938887  | 4.1344938006 |
| H | 0.3853150409  | 5.20155554    | 3.402043324  |
| H | 1.0378097021  | -0.5554365091 | 4.0071059232 |
| H | 2.6190769416  | -1.3176313679 | 4.339376073  |
| H | 1.1378526873  | -2.293553034  | 4.2573357727 |
| H | 0.1583027092  | -4.8006510199 | 4.1662158636 |
| H | -2.2532427511 | -3.8709697333 | 4.4152996644 |
| H | -1.9367163393 | 7.3677196227  | 4.2451596203 |
| H | -1.2583004972 | 1.8804253543  | 4.674492216  |
| H | -0.9458574108 | 8.7740147453  | 3.807418094  |
| H | 0.3572655536  | 1.5337691147  | 5.2982137362 |
| H | -0.1743095417 | 7.2543402336  | 4.2732015048 |
| H | -0.2630825919 | 3.1997684454  | 5.330281777  |

### Excerpt from TDDFT output for $\mathbf{1}_{\text{calc}}$

Excited State 1: Singlet-A 2.8330 eV 437.64 nm f=0.0033  
<S\*\*2>=0.000  
260 -> 264 0.18852  
261 -> 264 0.54062  
261 -> 265 0.20193  
261 -> 270 0.16270  
261 -> 273 -0.13460  
262 -> 264 -0.15025

This state for optimization and/or second-order correction.

Total Energy, E(TD-HF/TD-KS) = -3665.02370041

Copying the excited state density for this state as the 1-particle RhoCI density.

Excited State 2: Singlet-A 3.0498 eV 406.53 nm f=0.0101  
<S\*\*2>=0.000  
261 -> 264 0.14980  
262 -> 264 0.59997  
262 -> 265 0.22267  
262 -> 270 0.17131

Excited State 3: Singlet-A 3.8467 eV 322.31 nm f=0.0046  
<S\*\*2>=0.000  
262 -> 263 -0.28065  
262 -> 265 0.36476  
262 -> 269 -0.11378  
262 -> 270 -0.10641  
262 -> 271 -0.21894  
262 -> 272 0.34292  
262 -> 274 0.14618  
262 -> 277 0.18194

Excited State 4: Singlet-A 3.8982 eV 318.05 nm f=0.0031  
<S\*\*2>=0.000  
262 -> 263 0.60491  
262 -> 264 -0.11238  
262 -> 265 0.23110  
262 -> 272 0.12273

Excited State 5: Singlet-A 4.0587 eV 305.47 nm f=0.0014  
<S\*\*2>=0.000  
262 -> 264 -0.19793  
262 -> 265 0.44546  
262 -> 266 -0.13818  
262 -> 269 0.14931  
262 -> 270 0.13168  
262 -> 271 0.18134  
262 -> 272 -0.25343  
262 -> 274 -0.15512  
262 -> 286 0.11268

Excited State 6: Singlet-A 4.2390 eV 292.48 nm f=0.2446  
<S\*\*2>=0.000  
260 -> 264 -0.13867  
261 -> 263 0.62372  
261 -> 264 0.13717



## GIAO calculations for $\mathbf{1}_{\text{calc}}$

References at:  $\text{SiMe}_4$  ( $^{29}\text{Si}$ : 355.4917,  $^{13}\text{C}$ : 190.2308);

$\text{PMe}_3$  ( $^{31}\text{P}$ : 391.7033)

| Atom | $\delta_{\text{exp}}$ ([D <sub>8</sub> ]-THF) | $\delta_{\text{calc}}$ (scrff(ccpm,solvent=THF)) |
|------|-----------------------------------------------|--------------------------------------------------|
| Si1  | -1.8 ppm                                      | +2.0 ppm                                         |
| Si2  | -10.9 ppm                                     | -9.1 ppm                                         |
| Si3  | -16.1 ppm                                     | -4.4 ppm                                         |
| C4   | +222.7 ppm                                    | +251.9 ppm                                       |
| P5   | +322.1 ppm                                    | +330.4 ppm (vs. $\text{H}_3\text{PO}_4$ , 85%)   |

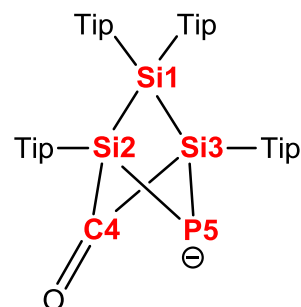

## Excerpt from Gaussian09/GIAO output

```

1 Si Isotropic = 353.5305 Anisotropy = 88.8292
XX= 351.0301 YX= -63.0122 ZX= 31.1742
XY= -76.2070 YY= 329.1385 ZY= 61.0599
XZ= -14.0544 YZ= -66.9644 ZZ= 380.4227
Eigenvalues: 269.5196 378.3219 412.7499

2 Si Isotropic = 364.5824 Anisotropy = 91.7391
XX= 398.3232 YX= 19.5724 ZX= -18.0476
XY= -51.1168 YY= 343.2255 ZY= -63.6526
XZ= -65.7642 YZ= -37.3746 ZZ= 352.1984
Eigenvalues: 282.7670 385.2384 425.7418

3 Si Isotropic = 359.8810 Anisotropy = 126.0777
XX= 421.9073 YX= -61.4136 ZX= 26.7993
XY= 47.8832 YY= 323.0199 ZY= -16.6251
XZ= 67.5103 YZ= -17.0764 ZZ= 334.7156
Eigenvalues: 304.6486 331.0615 443.9328

4 C Isotropic = -61.6916 Anisotropy = 127.4301
XX= -108.3243 YX= 6.6741 ZX= -7.0545
XY= -1.9012 YY= -96.5810 ZY= -77.5878
XZ= 3.0552 YZ= 37.2900 ZZ= 19.8304
Eigenvalues: -108.8281 -99.5085 23.2618

5 P Isotropic = 661.9534 Anisotropy = 330.2040
XX= 822.5360 YX= -98.3477 ZX= 70.7718
XY= -146.2944 YY= 614.8321 ZY= 281.1819
XZ= 65.0030 YZ= 125.8007 ZZ= 548.4921
Eigenvalues: 339.5760 764.1948 882.0894

6 O Isotropic = -225.2735 Anisotropy = 858.8743
XX= -251.6042 YX= -50.7408 ZX= -55.2200
XY= -80.2073 YY= -734.1546 ZY= -385.1482
XZ= -13.2991 YZ= -12.4324 ZZ= 309.9384
Eigenvalues: -780.1581 -242.9717 347.3094

```

z<sub>calc</sub> at ωB97XD/6-311g(d,p)

Frequencies not calculated

Charge = -1 Multiplicity = 1

|    |               |               |               |
|----|---------------|---------------|---------------|
| P  | -1.5833448362 | -0.6831977271 | -2.1173348066 |
| Si | 0.4461632605  | -0.2811692734 | -1.1720164228 |
| Si | -2.1401138099 | -0.6004479537 | -0.063217246  |
| Si | -0.2223346992 | -0.9900681206 | 0.9995722828  |
| C  | 4.4136984231  | -3.5574041734 | -6.0332021339 |
| C  | 0.772811665   | 0.1326350014  | -5.4369983858 |
| C  | 4.8699657098  | -3.1580661962 | -4.6258841105 |
| C  | 6.0937495952  | -2.2360229511 | -4.6831566052 |
| C  | 2.4976251963  | 1.6048910015  | -4.2937059973 |
| C  | 3.1098483731  | -1.3767502793 | -4.2489323821 |
| C  | 1.4762978942  | 0.4749942583  | -4.1189620019 |
| C  | 3.7510208715  | -2.5273633813 | -3.8211917779 |
| C  | -0.7840921015 | 3.3441579002  | -3.5963698748 |
| C  | 2.1109695012  | -0.7610430352 | -3.4958767348 |
| C  | 3.3359228168  | -3.0778733607 | -2.6184192971 |
| C  | 3.6500733162  | 5.8300992518  | -2.3945651519 |
| C  | 1.7286551351  | -1.2841789801 | -2.2397110232 |
| C  | -0.7502410122 | 2.7714481625  | -2.1751020649 |
| C  | 2.3436157136  | -2.4933903047 | -1.8335081412 |
| C  | -4.8808160565 | 1.6083391987  | -1.6244375871 |
| C  | 1.3654089544  | 3.8851829537  | -1.5435148706 |
| C  | 0.6545205519  | 2.6894005279  | -1.5888340506 |
| C  | 3.3957310503  | 5.2887529912  | -0.9832193352 |
| C  | -1.6836021114 | 3.5755041589  | -1.2658127797 |
| C  | 2.6463340353  | 3.972682328   | -1.020709896  |
| C  | 1.2353044413  | 1.4932907053  | -1.097183768  |
| C  | 4.4792876232  | -0.0013147102 | -0.7754051221 |
| C  | 0.6509629871  | -4.043247349  | -0.8375998694 |
| C  | 3.2038854871  | 2.8122891378  | -0.5120347767 |
| C  | 2.5284404443  | 1.5909903401  | -0.5270361908 |
| C  | 1.9171502336  | -3.2211283894 | -0.5719619782 |
| C  | 2.6657830168  | 6.3220385163  | -0.1172349932 |
| C  | -4.4715622639 | 1.5423452217  | -0.1483480464 |
| C  | 2.9980431299  | -4.0816114032 | 0.0819328663  |
| C  | 3.276631478   | 0.4085539946  | 0.084513014   |
| C  | -3.6568066462 | -4.1884509427 | -0.2416661947 |
| C  | -4.8632368635 | 0.1968626847  | 0.439402238   |
| C  | -8.751154137  | -2.5229228405 | 1.005148534   |
| C  | -3.9367691568 | -0.858091033  | 0.4979395612  |
| C  | -5.0202737929 | 2.7414750527  | 0.6279485247  |
| C  | -6.1751651046 | -0.0075718268 | 0.8637006312  |
| C  | -4.3620376129 | -2.1149445914 | 0.978054709   |
| C  | -6.6023446557 | -1.2384186091 | 1.3423030521  |
| C  | 3.7225038539  | 0.6870824183  | 1.5266316496  |
| C  | -5.6821837966 | -2.2808711198 | 1.3863049963  |
| C  | -8.0319717858 | -1.4345288179 | 1.8094417473  |
| C  | -3.4236383434 | -3.3127335787 | 0.9948200059  |
| C  | 0.2719722297  | 3.5713402175  | 1.8270655965  |
| C  | -0.4360633597 | 2.2238437207  | 1.9902840354  |

|   |               |               |               |
|---|---------------|---------------|---------------|
| C | -1.8706712812 | 2.4043413393  | 2.4972440542  |
| C | -3.5027480803 | -4.1309572801 | 2.2856499719  |
| C | 0.4537169151  | -0.1118068503 | 2.5760367745  |
| C | -8.0930280703 | -1.7300764051 | 3.3127450548  |
| C | 0.3203575598  | 1.258491379   | 2.8852743639  |
| C | 1.3575688818  | -2.4229179826 | 3.2649085767  |
| C | 2.7394970911  | -2.9497508128 | 3.6581131362  |
| C | 1.1820075956  | -0.9232810969 | 3.4834041785  |
| C | 0.2433144809  | -3.1976119156 | 3.9756271425  |
| C | 0.8815533766  | 1.76873679    | 4.0573097305  |
| C | 1.7379654918  | -0.3699351091 | 4.6324392744  |
| C | 1.6011560285  | 0.9779359782  | 4.9379063002  |
| C | 2.2623546369  | 1.5761808759  | 6.1640313822  |
| C | 3.7877024043  | 1.5875585464  | 6.0021016676  |
| C | 1.8519126464  | 0.8613956261  | 7.455502659   |
| H | 4.1256895176  | -2.6769159519 | -6.6156913805 |
| H | 5.2178571187  | -4.0671365381 | -6.5741805608 |
| H | 1.4800973795  | -0.2186173711 | -6.1956357805 |
| H | 3.5488041043  | -4.2236680377 | -5.9877504329 |
| H | 0.2636749208  | 1.0157559842  | -5.837042406  |
| H | 6.9259700775  | -2.7184703321 | -5.2067038014 |
| H | 3.3952364077  | -0.9345178859 | -5.1996263152 |
| H | 3.2878511837  | 1.3171992538  | -4.9951919799 |
| H | 0.0238391825  | -0.6464512901 | -5.2760691226 |
| H | 5.8535597211  | -1.3087912043 | -5.212733768  |
| H | 2.0169125337  | 2.506260046   | -4.6856728391 |
| H | 5.1672356921  | -4.073461395  | -4.1004958964 |
| H | -0.1312217373 | 2.7851439349  | -4.2681439765 |
| H | -1.8022056577 | 3.2820599334  | -3.9935306715 |
| H | 6.423368947   | -1.9665775533 | -3.676698286  |
| H | -0.4778788208 | 4.3955450653  | -3.6263411347 |
| H | 2.962420165   | 1.8617899268  | -3.3389748561 |
| H | 0.6967384267  | 0.8360498608  | -3.4524238862 |
| H | 4.194334154   | 5.0995335202  | -2.9983277794 |
| H | 2.7057689356  | 6.0446194051  | -2.9044879052 |
| H | 4.2326401129  | 6.7567675342  | -2.3599443976 |
| H | 3.8113949637  | -3.9934602837 | -2.2823919684 |
| H | -4.3629469021 | 0.8413980914  | -2.2048801904 |
| H | -1.1572751011 | 1.7625285618  | -2.230425258  |
| H | -4.6343907038 | 2.5846622491  | -2.053261026  |
| H | 0.8928247005  | 4.7838053074  | -1.9308908522 |
| H | 4.1836200279  | -0.223451908  | -1.8017674805 |
| H | -5.9605292377 | 1.4544210435  | -1.7253447354 |
| H | -2.6892411127 | 3.6144778762  | -1.6945541403 |
| H | 0.8565935952  | -4.8358213776 | -1.5665264794 |
| H | -1.3326376209 | 4.6053477731  | -1.1349274875 |
| H | 4.3701169095  | 5.0943101059  | -0.519453357  |
| H | 5.2264631819  | 0.7998732661  | -0.7984433553 |
| H | -0.1501181126 | -3.4122491493 | -1.2305280211 |
| H | 3.2393517726  | -4.9727344097 | -0.5073305054 |
| H | 1.6886061609  | 6.5668436086  | -0.5449672756 |
| H | 4.9561437822  | -0.894924844  | -0.359798654  |
| H | 3.2429810419  | 7.2498376058  | -0.0446279222 |
| H | -3.5143017381 | -3.607516711  | -1.1562677474 |
| H | -8.714059433  | -2.306058887  | -0.0652451053 |
| H | 4.201260911   | 2.8604117809  | -0.0835323244 |

|   |               |               |               |
|---|---------------|---------------|---------------|
| H | -1.7563703024 | 3.1179225248  | -0.2786756334 |
| H | -3.3780514231 | 1.6128336244  | -0.1076964438 |
| H | 3.9208874147  | -3.5161660472 | 0.2427480341  |
| H | 2.5994092076  | -0.4452882384 | 0.1324198592  |
| H | -4.6739211713 | -4.5970948506 | -0.2452823219 |
| H | 1.6334511557  | -2.4617118068 | 0.1584915382  |
| H | 0.2916473499  | -4.5008637054 | 0.0901187567  |
| H | -4.5549241772 | 3.6623001451  | 0.2632374577  |
| H | -2.9495517489 | -5.0235462084 | -0.2577570937 |
| H | -6.8880724644 | 0.8110501185  | 0.8175383328  |
| H | 2.4978999446  | 5.9359090608  | 0.8912752796  |
| H | -6.1021876676 | 2.847036322   | 0.4980758238  |
| H | -9.8007245309 | -2.6008125384 | 1.3069565187  |
| H | -8.2844511859 | -3.4999518737 | 1.1630502858  |
| H | 2.6405655091  | -4.4287568109 | 1.0555986112  |
| H | -8.559707388  | -0.4893535698 | 1.6355110728  |
| H | -0.4905932183 | 1.7606749764  | 1.0033862305  |
| H | 4.5237096499  | 1.43284038    | 1.5622138198  |
| H | -0.2251766345 | 4.1676199365  | 1.059250111   |
| H | -4.811339464  | 2.6527003664  | 1.6966689367  |
| H | -2.399177646  | -2.9351316169 | 0.9330660404  |
| H | 1.3085594577  | 3.4284221147  | 1.5131486238  |
| H | -6.0033642338 | -3.2537805254 | 1.7472893323  |
| H | 4.1082998094  | -0.2305502341 | 1.9818733773  |
| H | 2.8948110458  | 1.0423645944  | 2.1415180639  |
| H | -2.4177269003 | 3.1166121025  | 1.8712943536  |
| H | 1.2291930318  | -2.6134748033 | 2.195898822   |
| H | -4.4582702315 | -4.6575204468 | 2.3842200521  |
| H | -2.4119070588 | 1.4534124969  | 2.4831572488  |
| H | 0.2647429704  | 4.1585194429  | 2.7517163822  |
| H | -2.7103840828 | -4.8853260669 | 2.2958961797  |
| H | -9.1308849574 | -1.8099666571 | 3.6525213056  |
| H | -7.5887626909 | -2.6735323502 | 3.5434159385  |
| H | 3.5332824938  | -2.3622223879 | 3.188733644   |
| H | 2.8477841803  | -3.9882510997 | 3.3316163601  |
| H | -3.3735550813 | -3.4931988531 | 3.1641967577  |
| H | -7.6001151044 | -0.9405168527 | 3.8852557204  |
| H | -1.8765345671 | 2.7846789459  | 3.5246915805  |
| H | 0.3565997347  | -4.275536343  | 3.8167806579  |
| H | -0.7336497341 | -2.8975847698 | 3.5871011221  |
| H | 2.899450469   | -2.9353886684 | 4.7412036796  |
| H | 0.7701701751  | 2.8246798164  | 4.285364051   |
| H | 0.2603411429  | -3.0033155791 | 5.0536894346  |
| H | 2.3032443539  | -1.0048946644 | 5.3070031724  |
| H | 4.0775714328  | 2.1307539964  | 5.0992716801  |
| H | 1.9268549708  | 2.6172990413  | 6.2389863787  |
| H | 4.1702249456  | 0.5661661197  | 5.9113600052  |
| H | 4.2730574108  | 2.0579992662  | 6.8638231033  |
| H | 0.765477908   | 0.8585212702  | 7.5736381371  |
| H | 2.1901362364  | -0.1792186548 | 7.4535487403  |
| H | 2.2945976948  | 1.3530410782  | 8.3279278463  |

### Excerpt from TDDFT output for 2<sub>calc</sub>

Excited State 1: Singlet-A 2.4267 eV 510.92 nm  
f=0.1196 <S\*\*2>=0.000  
255 -> 256 0.68723  
This state for optimization and/or second-order correction.  
Total Energy, E(TD-HF/TD-KS) = -3551.66480125  
Copying the excited state density for this state as the 1-particle  
RhoCI density.

Excited State 2: Singlet-A 2.9968 eV 413.72 nm  
f=0.0115 <S\*\*2>=0.000  
255 -> 257 0.63943  
255 -> 258 -0.17386

Excited State 3: Singlet-A 3.4859 eV 355.67 nm  
f=0.0125 <S\*\*2>=0.000  
254 -> 256 0.13961  
255 -> 257 0.15739  
255 -> 258 0.61643  
255 -> 259 -0.10790  
255 -> 269 0.10318

Excited State 4: Singlet-A 3.6913 eV 335.88 nm  
f=0.0819 <S\*\*2>=0.000  
254 -> 256 0.65236  
254 -> 258 0.10775  
255 -> 258 -0.12688

Excited State 5: Singlet-A 3.9237 eV 315.99 nm  
f=0.0582 <S\*\*2>=0.000  
255 -> 259 0.52354  
255 -> 261 0.19289  
255 -> 262 0.34801

Excited State 6: Singlet-A 3.9771 eV 311.75 nm  
f=0.0590 <S\*\*2>=0.000  
253 -> 256 -0.33661  
255 -> 259 -0.27758  
255 -> 261 0.38059  
255 -> 262 0.27573  
255 -> 264 0.12666

## GIAO calculations for **2<sub>calc</sub>**

Reference at: SiMe<sub>4</sub> (<sup>29</sup>Si : 355.4917); PMe<sub>3</sub> (<sup>31</sup>P: 391.7033, corrected to H<sub>3</sub>PO<sub>4</sub> reference by subtracting 61 ppm)

| Atom | $\delta_{\text{exp}}$ ([D <sub>8</sub> ]-THF) | $\delta_{\text{calc}}$ (scrf(cpcm,solvent=THF))      |
|------|-----------------------------------------------|------------------------------------------------------|
| P1   | -55.7 ppm                                     | -38.5 ppm (vs. H <sub>3</sub> PO <sub>4</sub> , 85%) |
| Si2  | -14.9 ppm                                     | -11.5 ppm                                            |
| Si3  | +193.1 ppm                                    | +283.8 ppm                                           |
| Si4  | -39.9 ppm                                     | -43.4 ppm                                            |

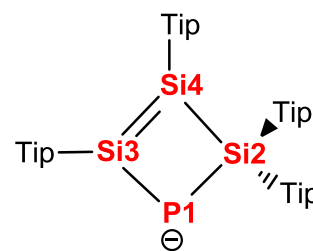

### Excerpt from Gaussian09/GIAO output

```
1 P Isotropic = 369.2374 Anisotropy = 332.7304
XX= 189.0080 YX= 109.4139 ZX= 58.4166
XY= 166.0949 YY= 421.6812 ZY= -51.3290
XZ= 124.1234 YZ= 178.0732 ZZ= 497.0230
Eigenvalues: 116.1991 400.4555 591.0576
2 Si Isotropic = 367.0110 Anisotropy = 125.5141
XX= 341.3840 YX= -23.2226 ZX= -6.4213
XY= -29.8653 YY= 312.7613 ZY= -43.6884
XZ= -10.1009 YZ= -1.1877 ZZ= 446.8876
Eigenvalues: 293.3131 357.0327 450.6870
3 Si Isotropic = 71.7250 Anisotropy = 447.5116
XX= -192.2314 YX= 31.4201 ZX= -2.9453
XY= -10.1350 YY= 60.2929 ZY= 80.7149
XZ= 68.4147 YZ= 79.4837 ZZ= 347.1134
Eigenvalues: -194.3490 39.4578 370.0660
4 Si Isotropic = 398.9373 Anisotropy = 113.0151
XX= 388.2144 YX= -52.6351 ZX= 24.1307
XY= -20.8783 YY= 458.2449 ZY= -20.3471
XZ= -28.1641 YZ= 31.5645 ZZ= 350.3525
Eigenvalues: 350.0613 372.4699 474.2807
```

[K(18-crown-6)][2<sub>calc</sub>] at  $\omega$ B97XD/6-311g(d,p)

Frequencies not calculated

Charge = -1    Multiplicity = 1 (atom list rearranged)

|    |          |          |          |
|----|----------|----------|----------|
| P  | 1.04963  | -0.58766 | 0.41803  |
| Si | -1.17927 | -0.82424 | -0.0141  |
| Si | 0.54146  | 1.47678  | 0.0992   |
| Si | -1.36485 | 1.32132  | -0.98664 |
| K  | 4.10316  | -1.48513 | -0.03781 |
| O  | 5.38217  | -0.39406 | 2.13416  |
| O  | 5.9549   | 0.76564  | -0.35406 |
| O  | 4.63535  | -3.09017 | 2.34008  |
| O  | 4.40156  | -0.24829 | -2.44378 |
| O  | 3.27594  | -4.08785 | 0.10646  |
| O  | 3.2587   | -2.82734 | -2.39944 |
| C  | 1.52479  | 3.4969   | 3.82653  |
| C  | -5.97018 | -0.28861 | 5.02964  |
| C  | -6.62291 | 5.94584  | -1.37064 |
| C  | -1.90055 | 3.66594  | 2.18388  |
| C  | -3.78527 | 2.14091  | 2.8932   |
| C  | -6.67401 | 4.60952  | -0.62292 |
| C  | -4.67056 | 3.52972  | 0.47032  |
| C  | -0.7111  | 0.40618  | 4.103    |
| C  | -7.81972 | 3.73038  | -1.13857 |
| C  | -2.80586 | 2.49929  | 1.77431  |
| C  | 4.50294  | 7.18367  | 0.42339  |
| C  | -5.73122 | -1.59732 | 4.266    |
| C  | 1.92804  | 2.47328  | 2.76162  |
| C  | -5.35287 | 3.86949  | -0.68742 |
| C  | -5.48476 | -2.7622  | 5.22963  |
| C  | 3.46199  | 4.06676  | 1.57782  |
| C  | 5.05169  | 5.76105  | 0.58775  |
| C  | 2.94186  | 1.46731  | 3.30785  |
| C  | -3.48016 | 2.80256  | 0.44793  |
| C  | -3.29049 | -1.27587 | 3.67508  |
| C  | 2.42521  | 3.13663  | 1.48704  |
| C  | 3.93823  | 4.7393   | 0.46305  |
| C  | -4.60629 | -1.43072 | 3.26519  |
| C  | -0.85689 | -0.93889 | 3.38739  |
| C  | 6.19739  | 5.49893  | -0.39516 |
| C  | -4.80041 | 3.48677  | -1.9033  |
| C  | -0.49072 | -2.08851 | 4.33329  |
| C  | -2.24422 | -1.08825 | 2.77737  |
| C  | -2.92869 | 2.40304  | -0.78812 |
| C  | -4.85678 | -1.37348 | 1.90488  |
| C  | 1.84779  | 2.85092  | 0.23747  |
| C  | 3.32088  | 4.49446  | -0.76175 |
| C  | -3.61046 | 2.77083  | -1.97441 |
| C  | 2.27912  | 3.58267  | -0.89539 |
| C  | -2.49866 | -1.03718 | 1.38521  |
| C  | -3.84447 | -1.16969 | 0.96674  |
| C  | -5.40521 | -0.13502 | -0.75877 |
| C  | 6.31617  | 0.65228  | 1.99808  |

|   |          |          |          |
|---|----------|----------|----------|
| C | 5.52761  | -1.12235 | 3.32997  |
| C | 5.91505  | 1.52152  | 0.83681  |
| C | 1.54976  | 4.661    | -3.10041 |
| C | 1.62351  | 3.38749  | -2.25712 |
| C | -4.27961 | -1.14402 | -0.49542 |
| C | 4.45088  | -2.17319 | 3.39759  |
| C | -2.13151 | 3.59092  | -3.82017 |
| C | -3.04322 | 2.45108  | -3.35255 |
| C | -4.10041 | 2.12848  | -4.40967 |
| C | -2.24547 | -4.40794 | 1.67859  |
| C | -4.68654 | -2.54364 | -0.97332 |
| C | -0.9591  | -3.82799 | 1.08129  |
| C | 5.59596  | 1.54594  | -1.47704 |
| C | 2.29257  | 2.25572  | -3.04277 |
| C | 0.26578  | -4.64332 | 1.49724  |
| C | -1.27196 | -2.44184 | -1.08223 |
| C | 3.74225  | -4.18184 | 2.42224  |
| C | -1.07587 | -3.68602 | -0.43186 |
| C | 5.45916  | 0.64968  | -2.6801  |
| C | -1.7763  | -1.23483 | -3.31283 |
| C | -1.44073 | -2.46923 | -2.48639 |
| C | -0.53811 | -0.63339 | -3.97917 |
| C | 3.74904  | -4.94311 | 1.11912  |
| C | -1.02474 | -4.86876 | -1.16455 |
| C | -2.88887 | -1.47719 | -4.33751 |
| C | -1.33591 | -3.675   | -3.18352 |
| C | 3.90066  | -0.88254 | -3.60078 |
| C | -1.13057 | -4.88798 | -2.548   |
| C | 2.75643  | -1.77216 | -3.19289 |
| C | 2.22772  | -3.70241 | -1.97767 |
| C | 2.82189  | -4.74001 | -1.06398 |
| C | -2.26446 | -7.09002 | -2.97474 |
| C | -1.07441 | -6.18896 | -3.32525 |
| C | 0.25178  | -6.92832 | -3.1162  |
| H | -6.80928 | -0.38783 | 5.72514  |
| H | -7.56784 | 6.48605  | -1.25889 |
| H | -2.48076 | 4.58777  | 2.29585  |
| H | 1.02727  | 2.99347  | 4.66076  |
| H | 2.39456  | 4.02524  | 4.22924  |
| H | -5.08249 | -0.01154 | 5.60725  |
| H | -6.87024 | 4.82611  | 0.43338  |
| H | 0.8368   | 4.23955  | 3.41703  |
| H | -4.36901 | 3.00418  | 3.22889  |
| H | -5.81681 | 6.57805  | -0.99031 |
| H | -1.41086 | 3.4577   | 3.14083  |
| H | -6.18554 | 0.53178  | 4.34079  |
| H | -5.09359 | 3.83071  | 1.42343  |
| H | -3.23833 | 1.76203  | 3.75958  |
| H | 3.71537  | 7.38388  | 1.15356  |
| H | -8.78265 | 4.23729  | -1.0235  |
| H | -1.42318 | 0.49739  | 4.93021  |
| H | -1.12481 | 3.84296  | 1.43266  |
| H | 5.29516  | 7.92642  | 0.55678  |
| H | 5.45871  | 5.67481  | 1.60204  |
| H | -6.45182 | 5.79191  | -2.44037 |
| H | 0.29788  | 0.51562  | 4.51335  |



|   |          |          |          |
|---|----------|----------|----------|
| H | 3.90739  | 4.27746  | 2.54689  |
| H | -0.88863 | 1.23425  | 3.41481  |
| H | -6.34183 | -2.90038 | 5.8955   |
| H | -4.47372 | 1.35691  | 2.57036  |
| H | 2.56076  | 0.99352  | 4.21812  |
| H | -4.60618 | -2.57785 | 5.85521  |
| H | -7.85956 | 2.78297  | -0.5954  |
| H | -3.06699 | -1.29586 | 4.73783  |
| H | 3.88878  | 1.96173  | 3.55596  |
| H | -6.64095 | -1.82243 | 3.69742  |
| H | 1.02598  | 1.90684  | 2.50967  |
| H | 4.07493  | 7.31981  | -0.57444 |
| H | -2.17014 | 1.62766  | 1.61388  |
| H | -7.68448 | 3.50054  | -2.19997 |
| H | -1.07316 | -2.06573 | 5.25986  |
| H | 7.0097   | 6.21424  | -0.23823 |
| H | -5.3175  | -3.69456 | 4.6846   |
| H | 0.56692  | -2.01828 | 4.6099   |
| H | 3.14433  | 0.68623  | 2.5735   |
| H | 6.60174  | 4.49056  | -0.27258 |
| H | -5.31751 | 3.74947  | -2.82002 |
| H | -0.1247  | -0.94358 | 2.58032  |
| H | 6.32798  | 1.27147  | 2.90696  |
| H | -5.88068 | -1.48846 | 1.56054  |
| H | -5.16532 | 0.8477   | -0.35079 |
| H | 5.42502  | -0.45167 | 4.19561  |
| H | 5.86301  | 5.60195  | -1.43167 |
| H | 3.65253  | 5.04768  | -1.63423 |
| H | -0.65517 | -3.05977 | 3.86232  |
| H | -6.35276 | -0.46712 | -0.3231  |
| H | 1.1181   | 5.49057  | -2.53478 |
| H | 4.90784  | 1.92518  | 0.99778  |
| H | 6.61248  | 2.3703   | 0.77632  |
| H | -2.70088 | 4.51888  | -3.93624 |
| H | -1.33848 | 3.77148  | -3.0906  |
| H | 3.45956  | -1.70321 | 3.32153  |
| H | 7.32365  | 0.24104  | 1.84424  |
| H | -5.56104 | -0.02326 | -1.83612 |
| H | 4.51819  | -2.68473 | 4.36851  |
| H | 0.59656  | 3.06481  | -2.0728  |
| H | 6.51777  | -1.59737 | 3.37093  |
| H | 2.53213  | 4.97305  | -3.47009 |
| H | -2.16963 | -4.47377 | 2.76834  |
| H | -4.68588 | 3.00876  | -4.69246 |
| H | 0.91797  | 4.48343  | -3.97492 |
| H | -3.43418 | -0.82133 | -1.10354 |
| H | -0.81144 | -2.83986 | 1.50919  |
| H | -3.10699 | -3.78099 | 1.44263  |
| H | -2.40799 | 1.56626  | -3.24674 |
| H | -5.5404  | -2.91348 | -0.39652 |
| H | -4.79318 | 1.35898  | -4.05849 |
| H | 4.64495  | 2.06052  | -1.29084 |
| H | -1.66598 | 3.35013  | -4.78185 |
| H | 6.36557  | 2.30739  | -1.6721  |
| H | 0.36893  | -4.63998 | 2.58724  |
| H | 2.34844  | 1.33843  | -2.45186 |

|   |          |          |          |
|---|----------|----------|----------|
| H | 3.31104  | 2.54134  | -3.33141 |
| H | 2.72628  | -3.81951 | 2.61985  |
| H | -2.43265 | -5.41393 | 1.28817  |
| H | -3.86716 | -3.25757 | -0.87023 |
| H | -4.98204 | -2.51661 | -2.02664 |
| H | -3.61574 | 1.76272  | -5.32003 |
| H | -2.14415 | -0.47548 | -2.62331 |
| H | 4.03854  | -4.85412 | 3.24055  |
| H | 1.16332  | -4.20216 | 1.06346  |
| H | 1.72673  | 2.03985  | -3.95429 |
| H | 0.1679   | -0.28641 | -3.22206 |
| H | 0.19793  | -5.68996 | 1.18281  |
| H | -0.81592 | 0.23299  | -4.58891 |
| H | 5.24379  | 1.27366  | -3.55839 |
| H | 6.39439  | 0.10317  | -2.86653 |
| H | -3.21498 | -0.52268 | -4.75811 |
| H | -3.75429 | -1.95835 | -3.87564 |
| H | -0.90801 | -5.80933 | -0.63424 |
| H | 3.08745  | -5.81395 | 1.22665  |
| H | 4.76017  | -5.30217 | 0.88226  |
| H | 2.01951  | -1.19479 | -2.61965 |
| H | -0.04662 | -1.36678 | -4.62835 |
| H | 1.44301  | -3.1441  | -1.45139 |
| H | -2.55987 | -2.10323 | -5.17253 |
| H | 3.53463  | -0.12898 | -4.31241 |
| H | -1.44787 | -3.67184 | -4.26371 |
| H | 2.04343  | -5.47255 | -0.81153 |
| H | -2.23027 | -7.38865 | -1.92249 |
| H | 4.68967  | -1.47403 | -4.08583 |
| H | -3.21003 | -6.56907 | -3.14181 |
| H | 2.26309  | -2.16888 | -4.09111 |
| H | 3.65474  | -5.25949 | -1.55793 |
| H | 1.76637  | -4.19515 | -2.84329 |
| H | -1.15052 | -5.93622 | -4.38901 |
| H | 0.39144  | -7.19407 | -2.06351 |
| H | -2.25788 | -7.99984 | -3.58272 |
| H | 1.10155  | -6.31258 | -3.42295 |
| H | 0.277    | -7.85408 | -3.69848 |

Excerpt from TDDFT output for [K(18-crown-6)][2]<sub>calc</sub>

Excited State 1: Singlet-A 2.4101 eV 514.44 nm  
f=0.1304 <S\*\*2>=0.000  
336 -> 337 0.68629

This state for optimization and/or second-order correction.

Total Energy, E(TD-HF/TD-KS) = -5074.62431783

Copying the excited state density for this state as the 1-particle RhoCI density.

Excited State 2: Singlet-A 3.0414 eV 407.65 nm  
f=0.0037 <S\*\*2>=0.000  
336 -> 339 0.65200  
336 -> 340 -0.12124  
336 -> 350 0.12637

Excited State 3: Singlet-A 3.5538 eV 348.88 nm  
f=0.0156 <S\*\*2>=0.000  
336 -> 339 0.13423  
336 -> 340 0.62047  
336 -> 344 0.11696  
336 -> 351 0.13581

Excited State 4: Singlet-A 3.7559 eV 330.11 nm  
f=0.0988 <S\*\*2>=0.000  
335 -> 337 0.65314

Excited State 5: Singlet-A 4.0006 eV 309.92 nm  
f=0.0987 <S\*\*2>=0.000  
325 -> 337 0.10180  
332 -> 337 -0.10220  
334 -> 337 0.47283  
336 -> 342 -0.19518  
336 -> 343 0.12893  
336 -> 344 -0.16168  
336 -> 347 0.11439  
336 -> 348 -0.10790  
336 -> 350 -0.25841

Excited State 6: Singlet-A 4.0128 eV 308.97 nm  
f=0.0231 <S\*\*2>=0.000  
334 -> 337 0.41349  
336 -> 342 0.22947  
336 -> 343 -0.16634  
336 -> 344 0.29311  
336 -> 350 0.26242

Selected Molecular Orbitals of [K(18-crown-6)]<sub>2</sub><sub>calc</sub>

MO 326 (isovalue 0.05)

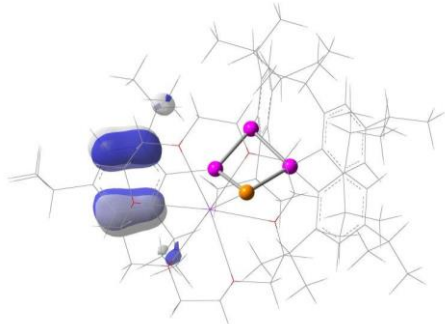

MO 327 (isovalue 0.05)

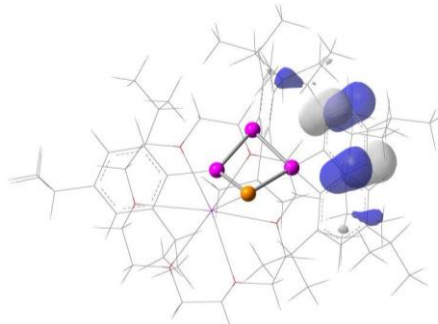

MO 328 (isovalue 0.05)

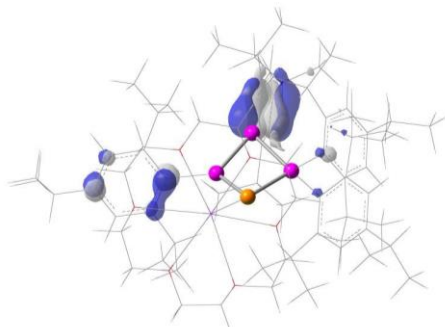

MO 329 (isovalue 0.05)

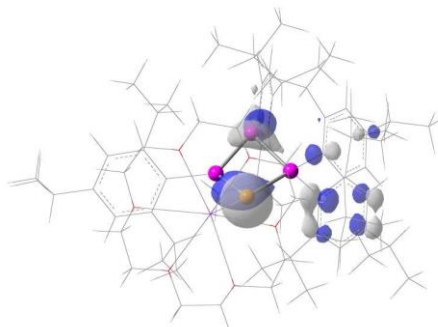

MO 330 (isovalue 0.05)

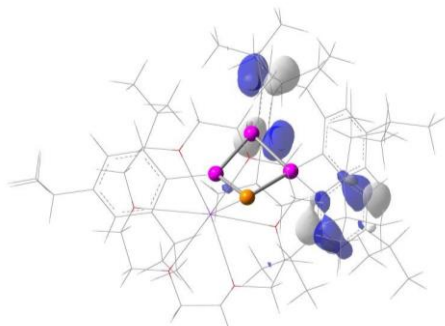

MO 331 (isovalue 0.05)

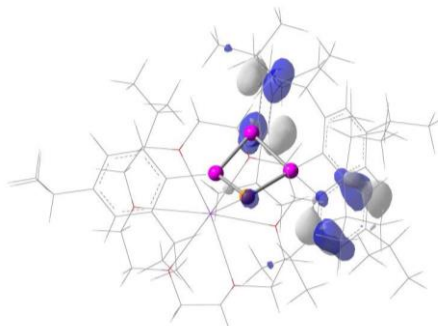

MO 332 (isovalue 0.05)

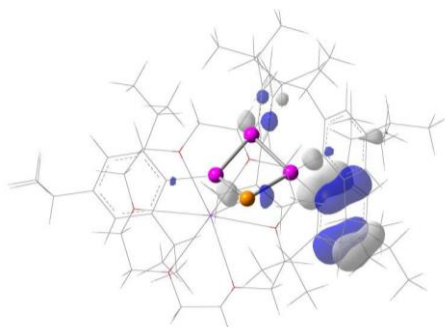

MO 333 (isovalue 0.05)

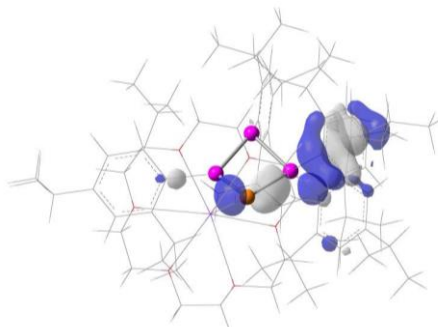

MO 334 (isovalue 0.05)

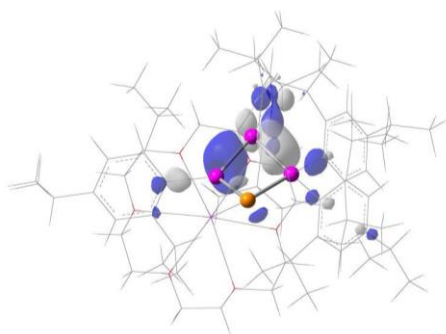

MO 335 (isovalue 0.05)

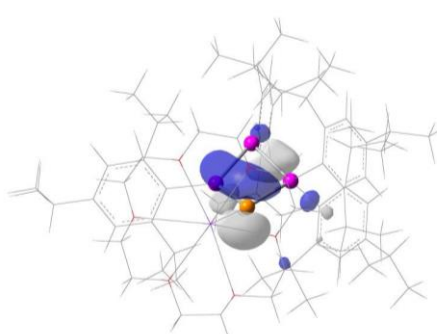

$\lambda = 330.1 \text{ nm}$   
 $f = 0.0988$   
85%

MO 336 = **HOMO** (isovalue 0.05)

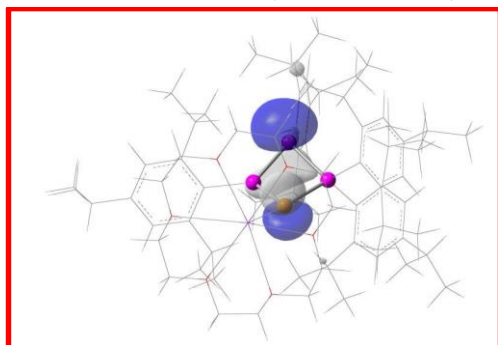

$\lambda = 514.4 \text{ nm}$   
 $f = 0.1304$   
94%

MO 337 = **LUMO** (isovalue 0.05)

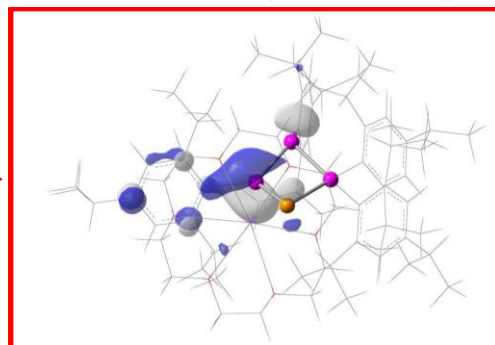

MO 338 (isovalue 0.035)

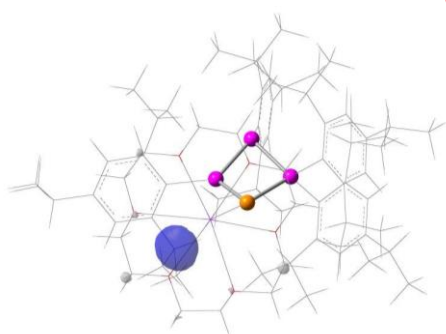

$\lambda = 407.7 \text{ nm}$   
 $f = 0.0037$   
85%

MO 339 (isovalue 0.05)

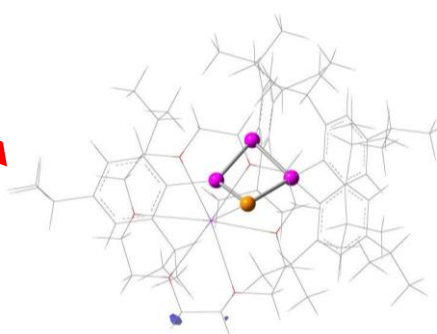

$\lambda = 348.9 \text{ nm}$   
 $f = 0.0156$   
85%

MO 340 (isovalue 0.05)

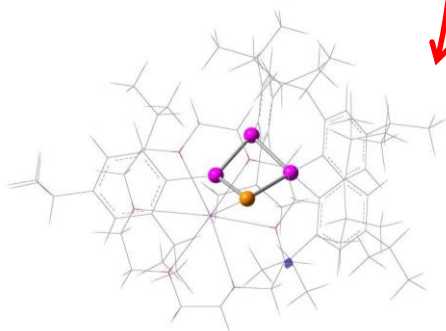

MO 341 (isovalue 0.05)

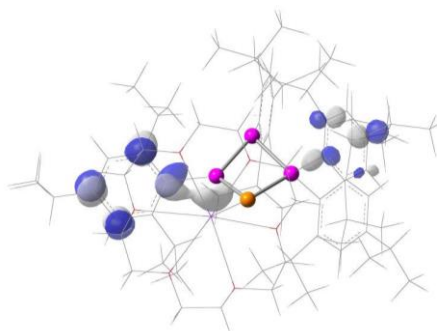

MO 342 (isovalue 0.05)

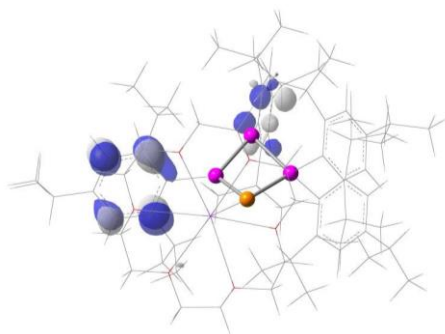

MO 343 (isovalue 0.05)

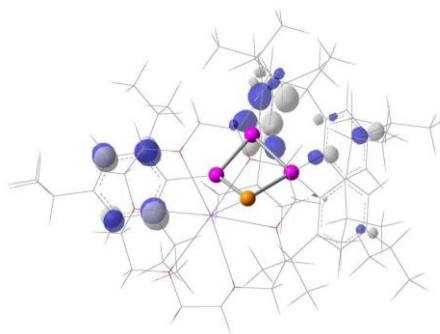

MO 344 (isovalue 0.05)

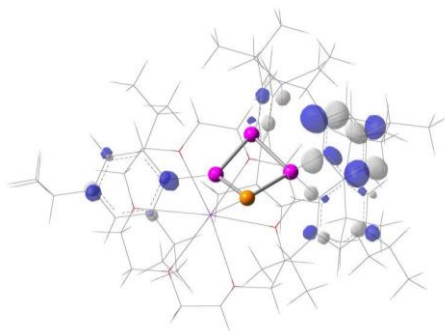

MO 345 (isovalue 0.05)

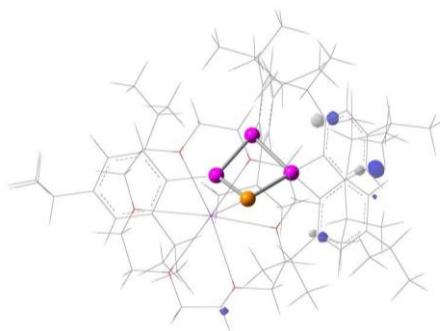

MO 346 (isovalue 0.05)

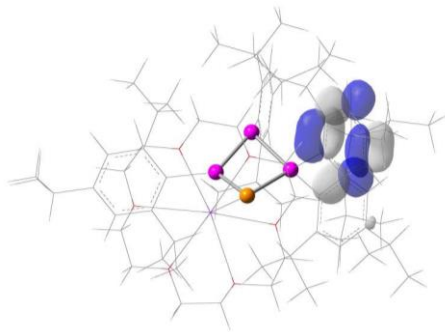

GIAO calculations for [K(18-crown-6)][2]<sub>calc</sub>

Reference at: SiMe<sub>4</sub> (<sup>29</sup>Si : 355.4917, <sup>13</sup>C: 190.2308);

PMe<sub>3</sub> (<sup>31</sup>P: 391.7033 corrected to H<sub>3</sub>PO<sub>4</sub> reference by  
subtracting 61 ppm)

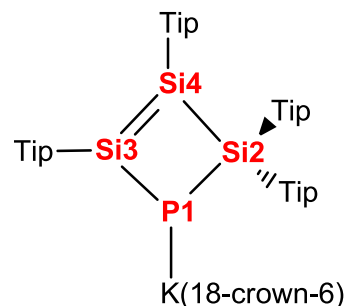

| Atom | $\delta_{\text{exp}}$ ([D <sub>8</sub> ]-THF) | $\delta_{\text{calc}}$ (scrf(cpcm,solvent=thf))      |
|------|-----------------------------------------------|------------------------------------------------------|
| P1   | -55.7 ppm                                     | -76.9 ppm (vs. H <sub>3</sub> PO <sub>4</sub> , 85%) |
| Si2  | -14.9 ppm                                     | -11.0 ppm                                            |
| Si3  | +193.1 ppm                                    | +265.8 ppm                                           |
| Si4  | -39.9 ppm                                     | -39.2 ppm                                            |

Excerpt from Gaussian09/GIAO output (corrected for atom order)

```

1 P Isotropic = 407.6499 Anisotropy = 270.3494
XX= 304.4439 YX= -130.7151 ZX= -98.0652
XY= -109.6198 YY= 425.8525 ZY= -15.4923
XZ= 33.7680 YZ= -213.4940 ZZ= 492.6532
Eigenvalues: 202.1052 432.9616 587.8828
2 Si Isotropic = 366.5408 Anisotropy = 118.2020
XX= 357.0259 YX= 22.4052 ZX= -49.1195
XY= 16.5732 YY= 309.9455 ZY= 47.2905
XZ= -1.1276 YZ= 17.7166 ZZ= 432.6511
Eigenvalues: 291.8934 362.3869 445.3422
3 Si Isotropic = 89.6832 Anisotropy = 427.6442
XX= 5.0640 YX= -80.3327 ZX= 24.2390
XY= -120.5487 YY= -100.9329 ZY= -32.7934
XZ= -34.9248 YZ= -102.5812 ZZ= 364.9186
Eigenvalues: -168.4647 62.7350 374.7793
4 Si Isotropic = 394.6634 Anisotropy = 135.4245
XX= 477.3045 YX= -55.5189 ZX= -21.2187
XY= 0.7770 YY= 360.6449 ZY= 3.1927
XZ= 54.7716 YZ= 13.4240 ZZ= 346.0407
Eigenvalues: 336.7990 362.2448 484.9464

```

**NMR-Standards at ωB97XD/6-311g(d,p); scrf(cpcm,solvent=thf)**

SiMe<sub>4</sub> (NIF = 0)

|    |          |          |          |
|----|----------|----------|----------|
| Si | 0.00005  | 0.00003  | -0.00001 |
| C  | 1.84855  | 0.33705  | 0.07691  |
| H  | 2.25063  | 0.5656   | -0.91479 |
| H  | 2.06888  | 1.18755  | 0.72916  |
| H  | 2.39287  | -0.5293  | 0.46485  |
| C  | -0.63916 | -0.38611 | 1.7258   |
| H  | -0.46645 | 0.45152  | 2.40837  |
| H  | -1.71443 | -0.58858 | 1.71322  |
| H  | -0.14015 | -1.26506 | 2.14508  |
| C  | -0.8863  | 1.5164   | -0.67189 |
| H  | -0.536   | 1.76608  | -1.67802 |
| H  | -1.96654 | 1.35099  | -0.72739 |
| H  | -0.71588 | 2.38919  | -0.03429 |
| C  | -0.32313 | -1.46736 | -1.1308  |
| H  | 0.18001  | -2.36743 | -0.76462 |
| H  | -1.39288 | -1.68791 | -1.19674 |
| H  | 0.03943  | -1.27292 | -2.14475 |

|              |          |             |          |              |          |
|--------------|----------|-------------|----------|--------------|----------|
| 1            | Si       | Isotropic = | 355.4917 | Anisotropy = | 0.1971   |
| XX=          | 355.5405 | YX=         | 0.0273   | ZX=          | -0.0994  |
| XY=          | -0.0436  | YY=         | 355.4883 | ZY=          | -0.1858  |
| XZ=          | -0.0329  | YZ=         | -0.0847  | ZZ=          | 355.4463 |
| Eigenvalues: | 355.3163 | 355.5357    | 355.6231 |              |          |
| 2            | C        | Isotropic = | 190.2308 | Anisotropy = | 8.0421   |
| XX=          | 195.3105 | YX=         | 1.4401   | ZX=          | 0.3062   |
| XY=          | 1.4479   | YY=         | 187.7919 | ZY=          | 0.0370   |
| XZ=          | 0.3567   | YZ=         | 0.0614   | ZZ=          | 187.5902 |
| Eigenvalues: | 187.5215 | 187.5788    | 195.5923 |              |          |
| 3            | H        | Isotropic = | 31.9949  | Anisotropy = | 9.7793   |
| XX=          | 32.7245  | YX=         | 1.5529   | ZX=          | -4.2199  |
| XY=          | 1.5047   | YY=         | 28.5219  | ZY=          | -1.8541  |
| XZ=          | -3.9671  | YZ=         | -1.8005  | ZZ=          | 34.7383  |
| Eigenvalues: | 27.9509  | 29.5193     | 38.5144  |              |          |

PMe<sub>3</sub> (NIF = 0)

|   |          |          |          |
|---|----------|----------|----------|
| P | -0.00004 | 0.00046  | -0.60525 |
| C | -1.41978 | 0.79099  | 0.27979  |
| H | -2.35311 | 0.30592  | -0.01573 |
| H | -1.31592 | 0.72353  | 1.3675   |
| H | -1.48838 | 1.84413  | -0.00284 |
| C | 1.39537  | 0.83324  | 0.27979  |
| H | 1.29426  | 0.76254  | 1.36762  |
| H | 2.3428   | 0.37681  | -0.01646 |
| H | 1.43192  | 1.88808  | -0.00262 |
| C | 0.02446  | -1.62493 | 0.27931  |
| H | -0.85095 | -2.21297 | -0.00626 |
| H | 0.91307  | -2.18937 | -0.01287 |
| H | 0.02673  | -1.50131 | 1.36713  |



|              |          |             |          |              |          |
|--------------|----------|-------------|----------|--------------|----------|
| 1            | P        | Isotropic = | 391.7033 | Anisotropy = | 16.7347  |
| XX=          | 402.6369 | YX=         | 0.0424   | ZX=          | 0.0594   |
| XY=          | 0.0529   | YY=         | 402.8496 | ZY=          | -0.2124  |
| XZ=          | 0.0527   | YZ=         | 0.1619   | ZZ=          | 369.6235 |
| Eigenvalues: | 369.6234 | 402.6268    | 402.8598 |              |          |
| 2            | C        | Isotropic = | 171.9652 | Anisotropy = | 28.1018  |
| XX=          | 178.9549 | YX=         | -10.7654 | ZX=          | 6.8384   |
| XY=          | -10.6981 | YY=         | 165.9889 | ZY=          | -3.6754  |
| XZ=          | 11.7891  | YZ=         | -6.4517  | ZZ=          | 170.9518 |
| Eigenvalues: | 159.9297 | 165.2662    | 190.6997 |              |          |
| 3            | H        | Isotropic = | 30.9512  | Anisotropy = | 10.4647  |
| XX=          | 37.6026  | YX=         | 1.2776   | ZX=          | -1.3876  |
| XY=          | 1.2867   | YY=         | 27.8974  | ZY=          | -0.8198  |
| XZ=          | -1.0305  | YZ=         | -0.6419  | ZZ=          | 27.3537  |
| Eigenvalues: | 26.8380  | 28.0880     | 37.9277  |              |          |

## 8. References

- [1] A. R. Jupp, J. M. Goicoechea, *Angew. Chem.* **2013**, *125*, 10248–10251; *Angew. Chem. Int. Ed.* **2013**, *52*, 10064–10067.
- [2] K. Leszczyńska, K. Abersfelder, A. Mix, B. Neumann, H.-G. Stammer, M. J. Cowley, P. Jutzi, D. Scheschkewitz, *Angew. Chem.* **2012**, *124*, 6891–6895; *Angew. Chem. Int. Ed.* **2012**, *51*, 6785–6788.
- [3] *CrysAlisPro*, Agilent Technologies, Version 1.171.35.8.
- [4] (a) G. M. Sheldrick in *SHELXL97, Programs for Crystal Structure Analysis (Release 97-2)*, Institut für Anorganische Chemie der Universität, Tammanstrasse 4, D-3400 Göttingen, Germany, 1998; (b) G. M. Sheldrick, *Acta Crystallogr. Sect. A* **1990**, *46*, 467–473; (c) G. M. Sheldrick, *Acta Crystallogr. Sect. A* **2008**, *64*, 112–122.
